# Supplementary material for: Immune Cell-Based Clustering Reveals Clinically Distinct Endotypes in Type 2 Diabetes
Source: Research Square preprint supplement (doi:10.21203/rs.3.rs-7752906/v1), 2025-10-08
Supplement: Supplementary file 1 [file 46332500459dcba0ac4d4140.pdf]

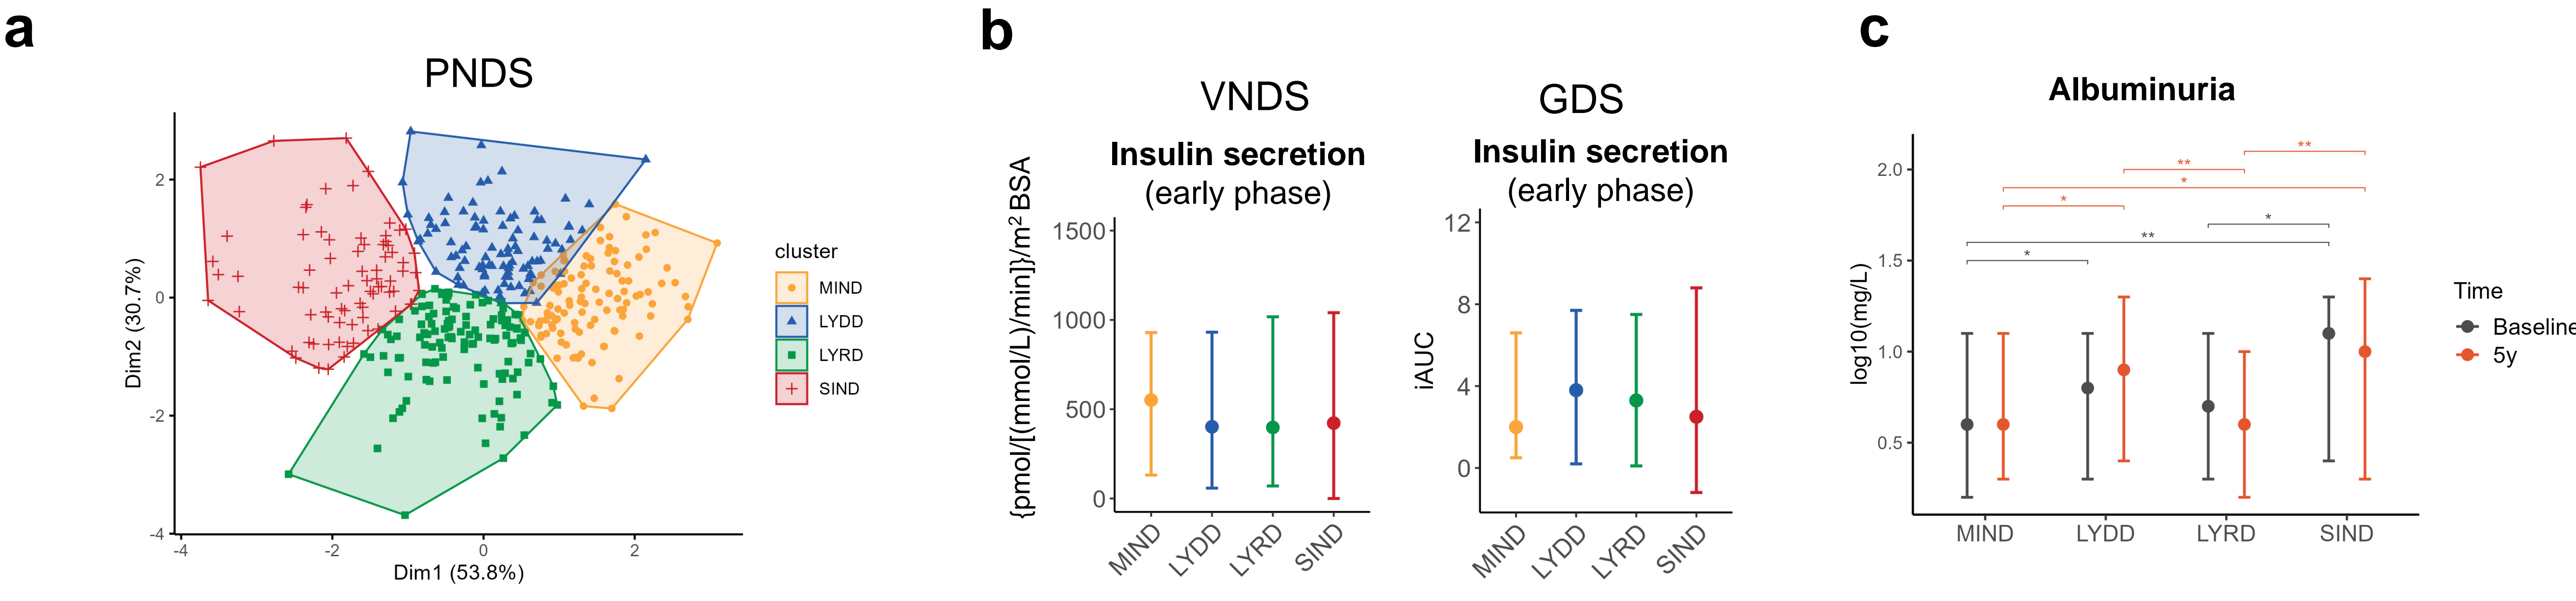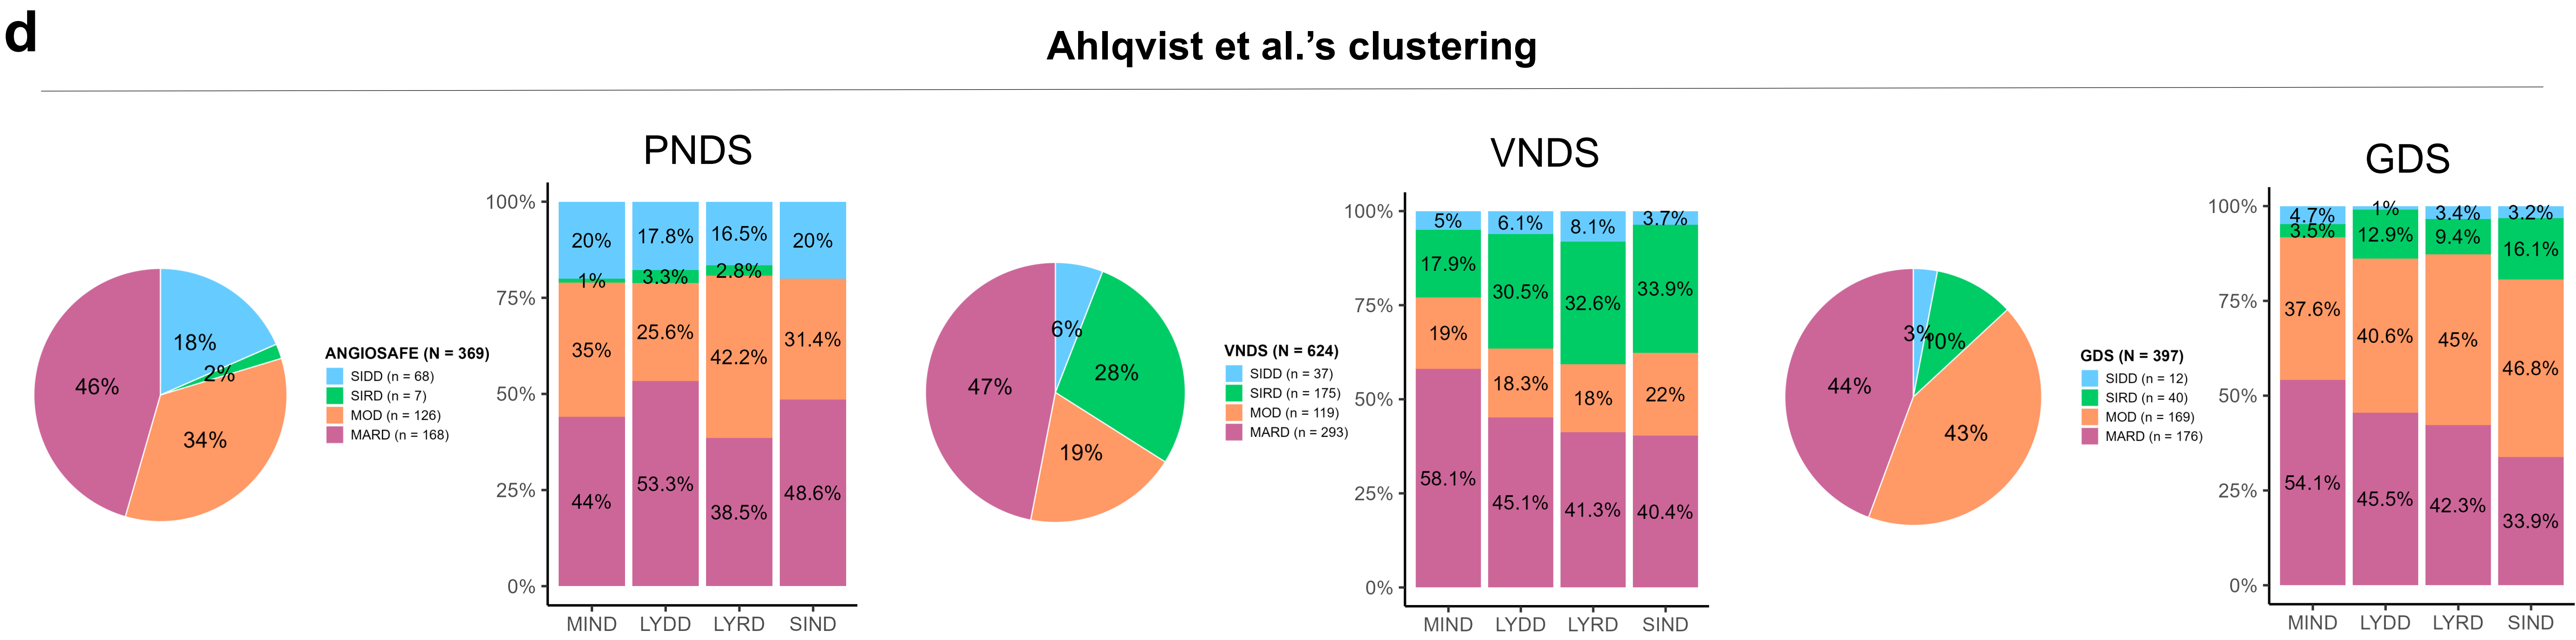

**Extended Data Fig. 1: Characteristics of four endotypes in newly-diagnosed T2D cohorts (related to Fig. 2)**

**a**, UMAP showing four endotypes identified by k-mean clustering in the PNDS discovery cohort. **b**, Early-phase insulin secretion of endotypes in the VNDS and GDS cohort. **c**, Renal functions (albuminuria) across endotypes at diagnosis and 5-year follow-up in the GDS cohort. **d**, Distribution of Ahlqvist's clusters across the immune-based endotypes in the PNDS, VNDS, and GDS cohort. In the line plots, dots represent median values and error bars indicate the interquartile range (Q1, Q3). Pairwise comparisons between endotypes were performed using Dunn's test.



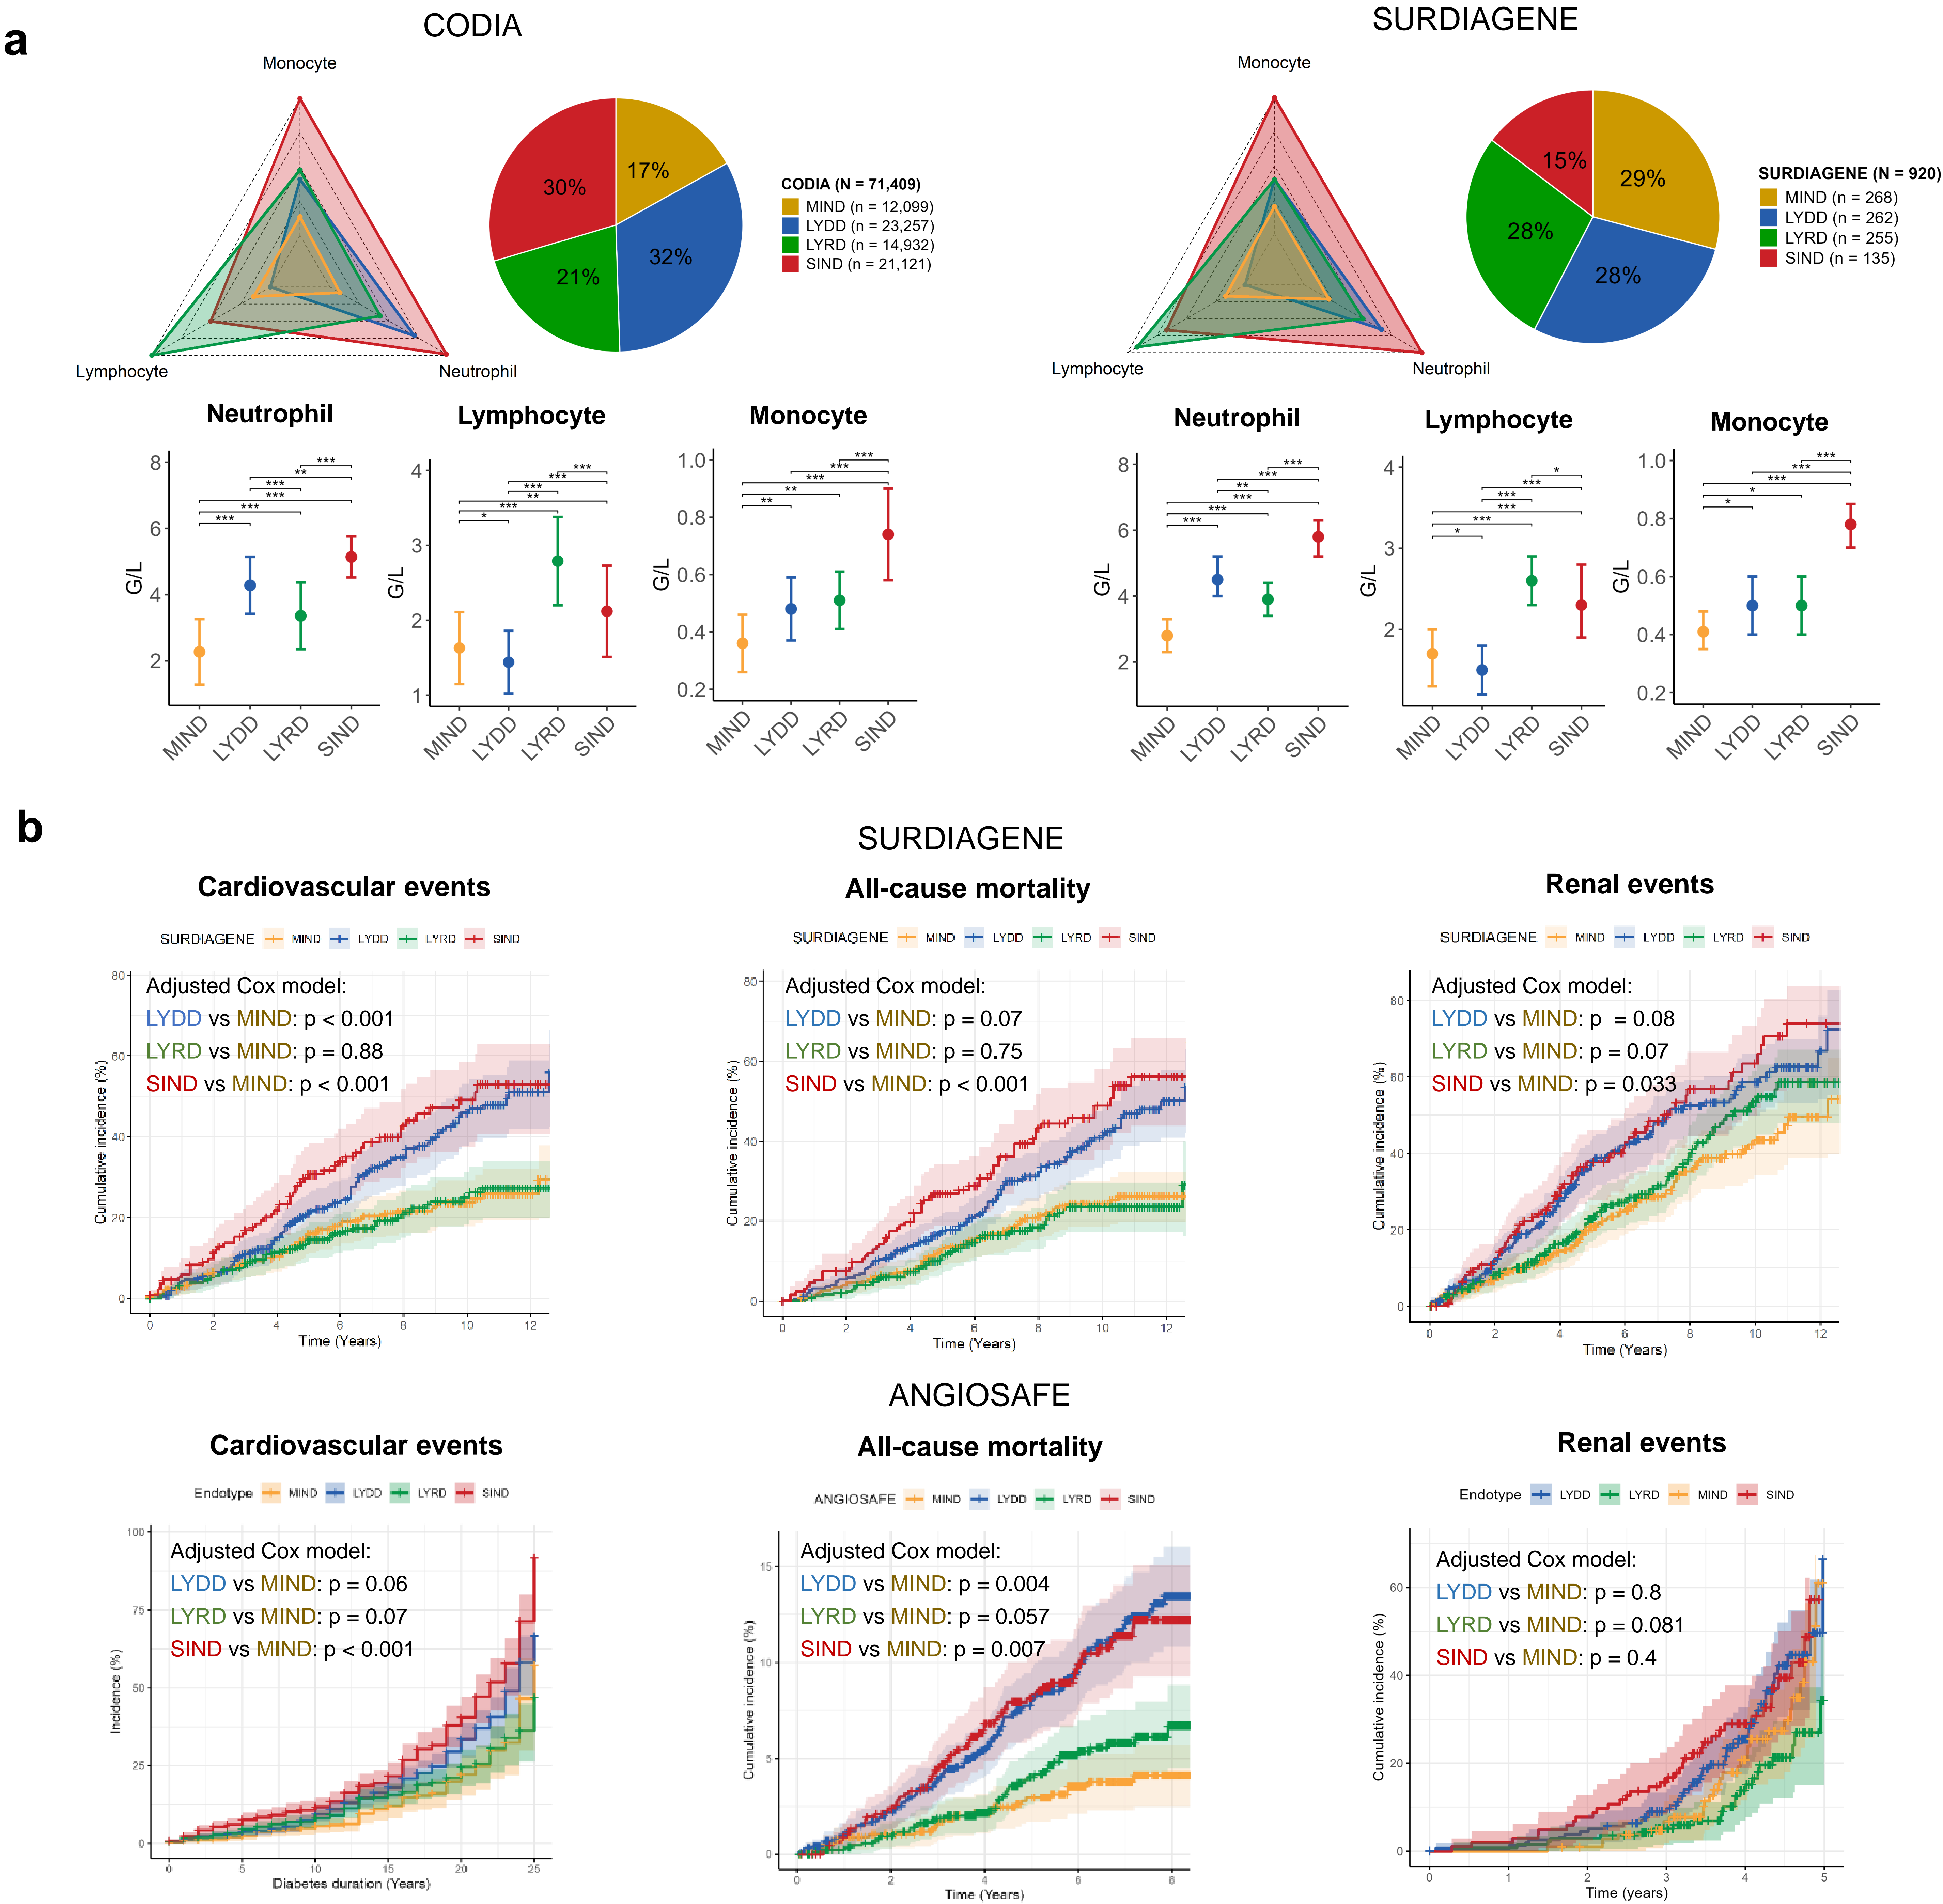

**Extended Data Fig. 2: Longitudinal stability of circulating immune cell counts across endotypes and their trajectories toward T2D-related complications (related to Fig. 3)**

**a**, Distribution of endotypes and their immune profiles across the CODIA and SURDIAGENE cohorts. **b**, Cumulative incidence of cardiovascular events, all-cause mortality, and renal events across endotypes in the SURDIAGENE and ANGIOSAFE cohort. In the radar plots, dots indicate median values of immune cell counts. In the line plots, dots represent median values and error bars indicate the interquartile range (Q1, Q3). Pairwise comparisons between endotypes were performed using Dunn’s test.



**a**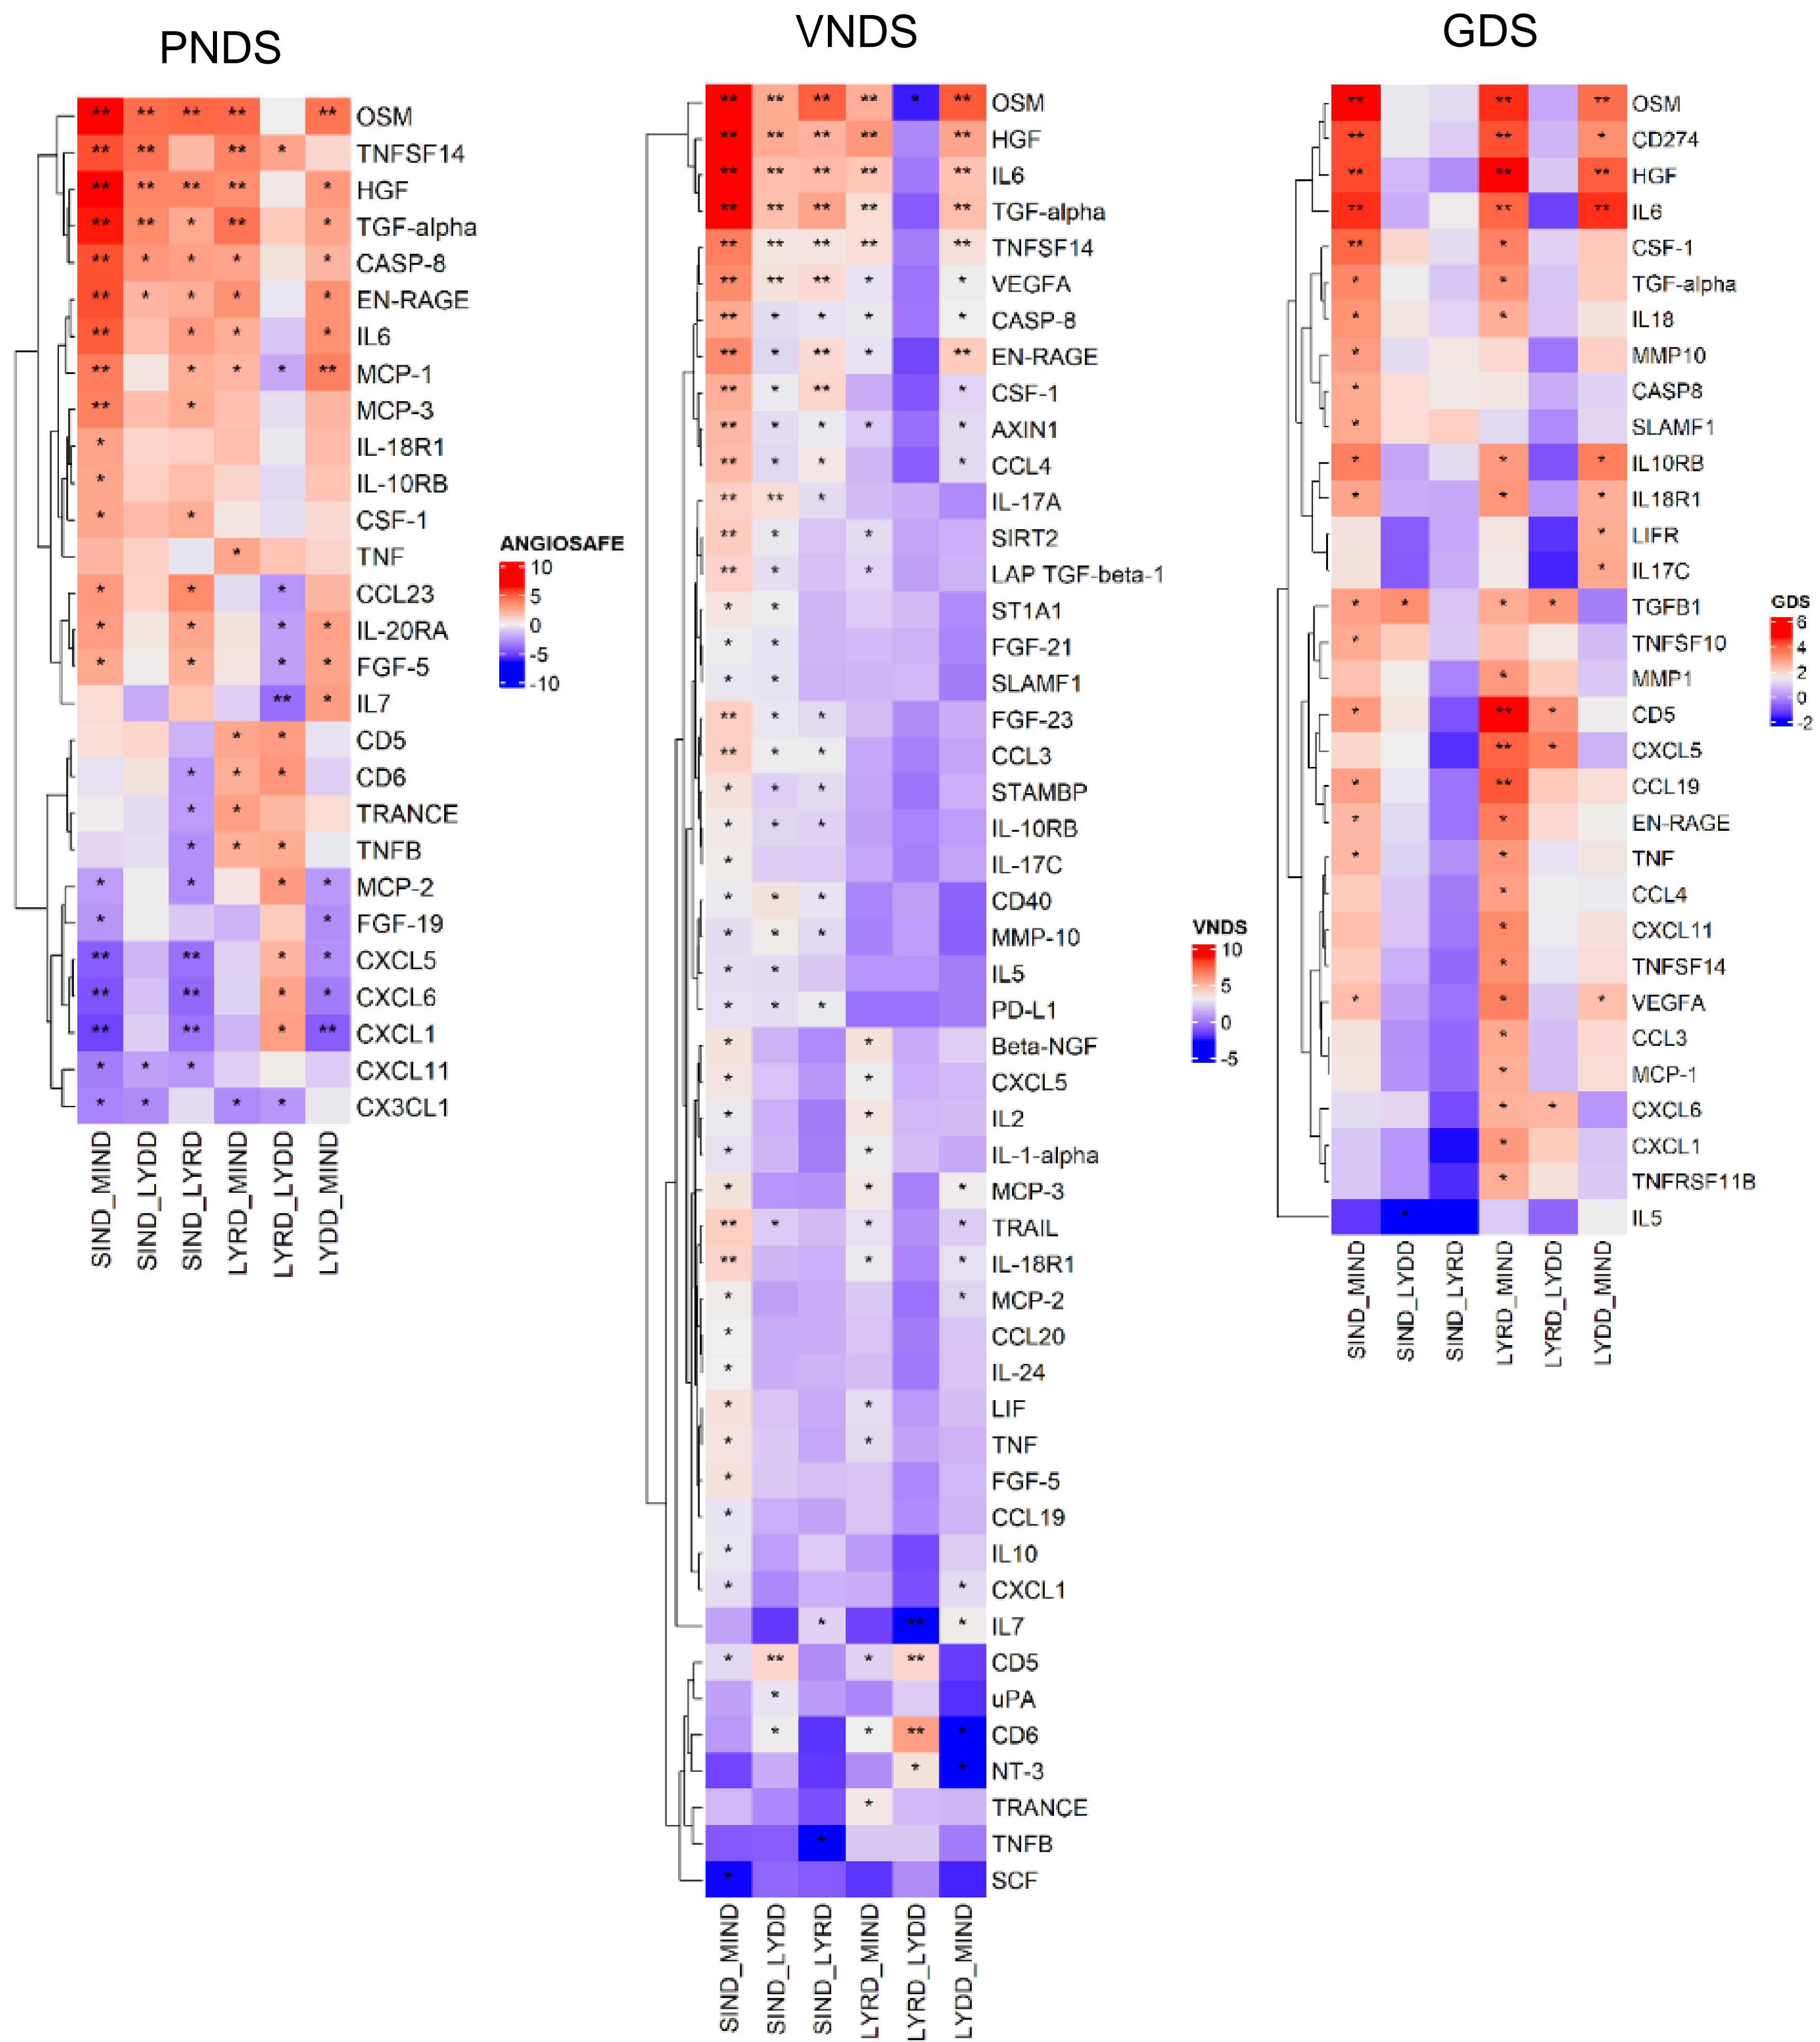**b**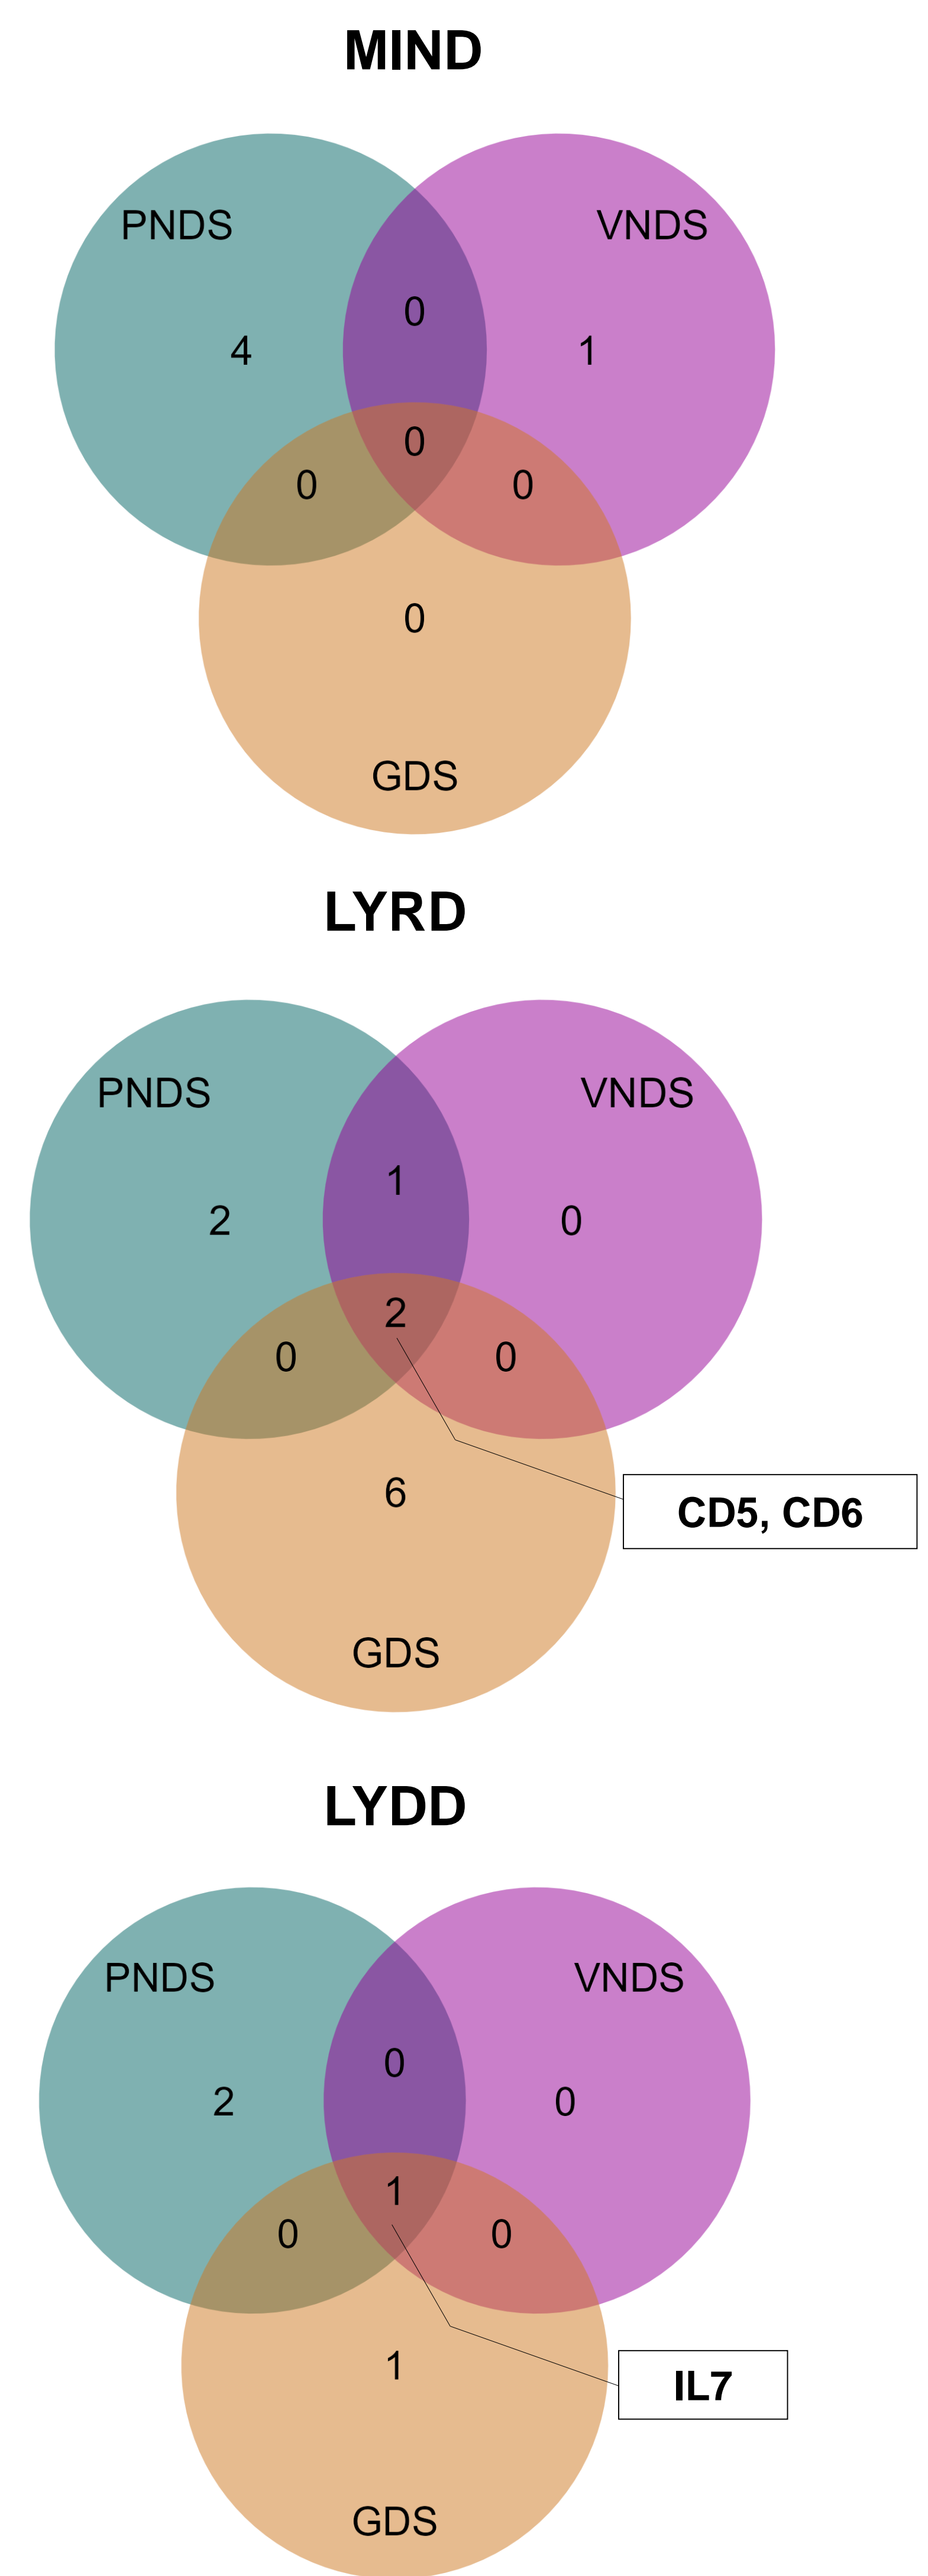**c**

### Pathway Enrichment Analysis of proteins in SIND

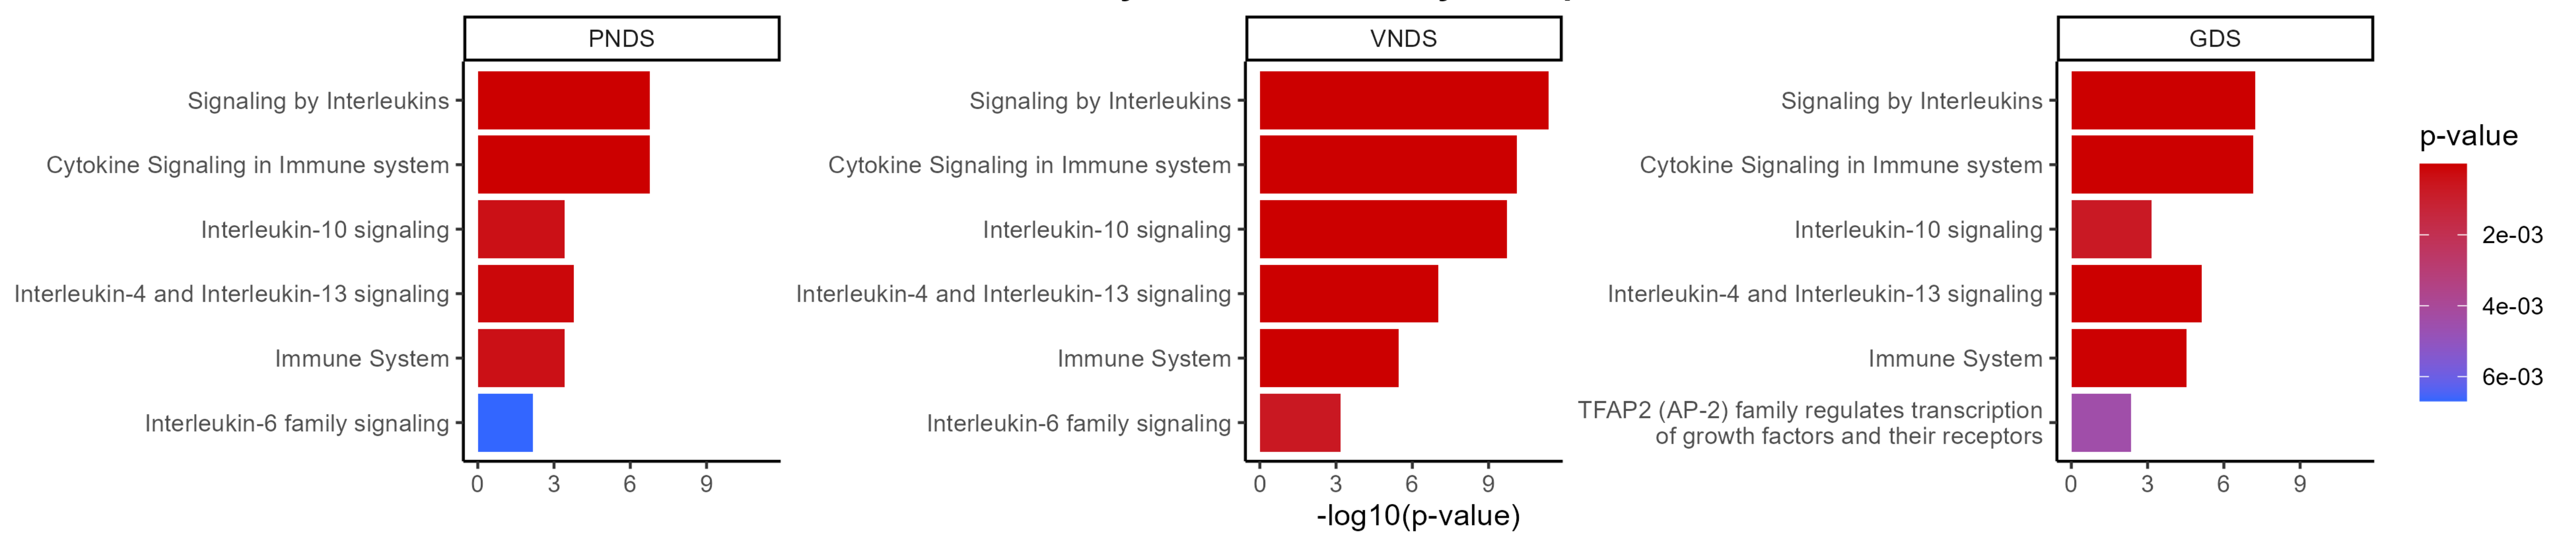**d**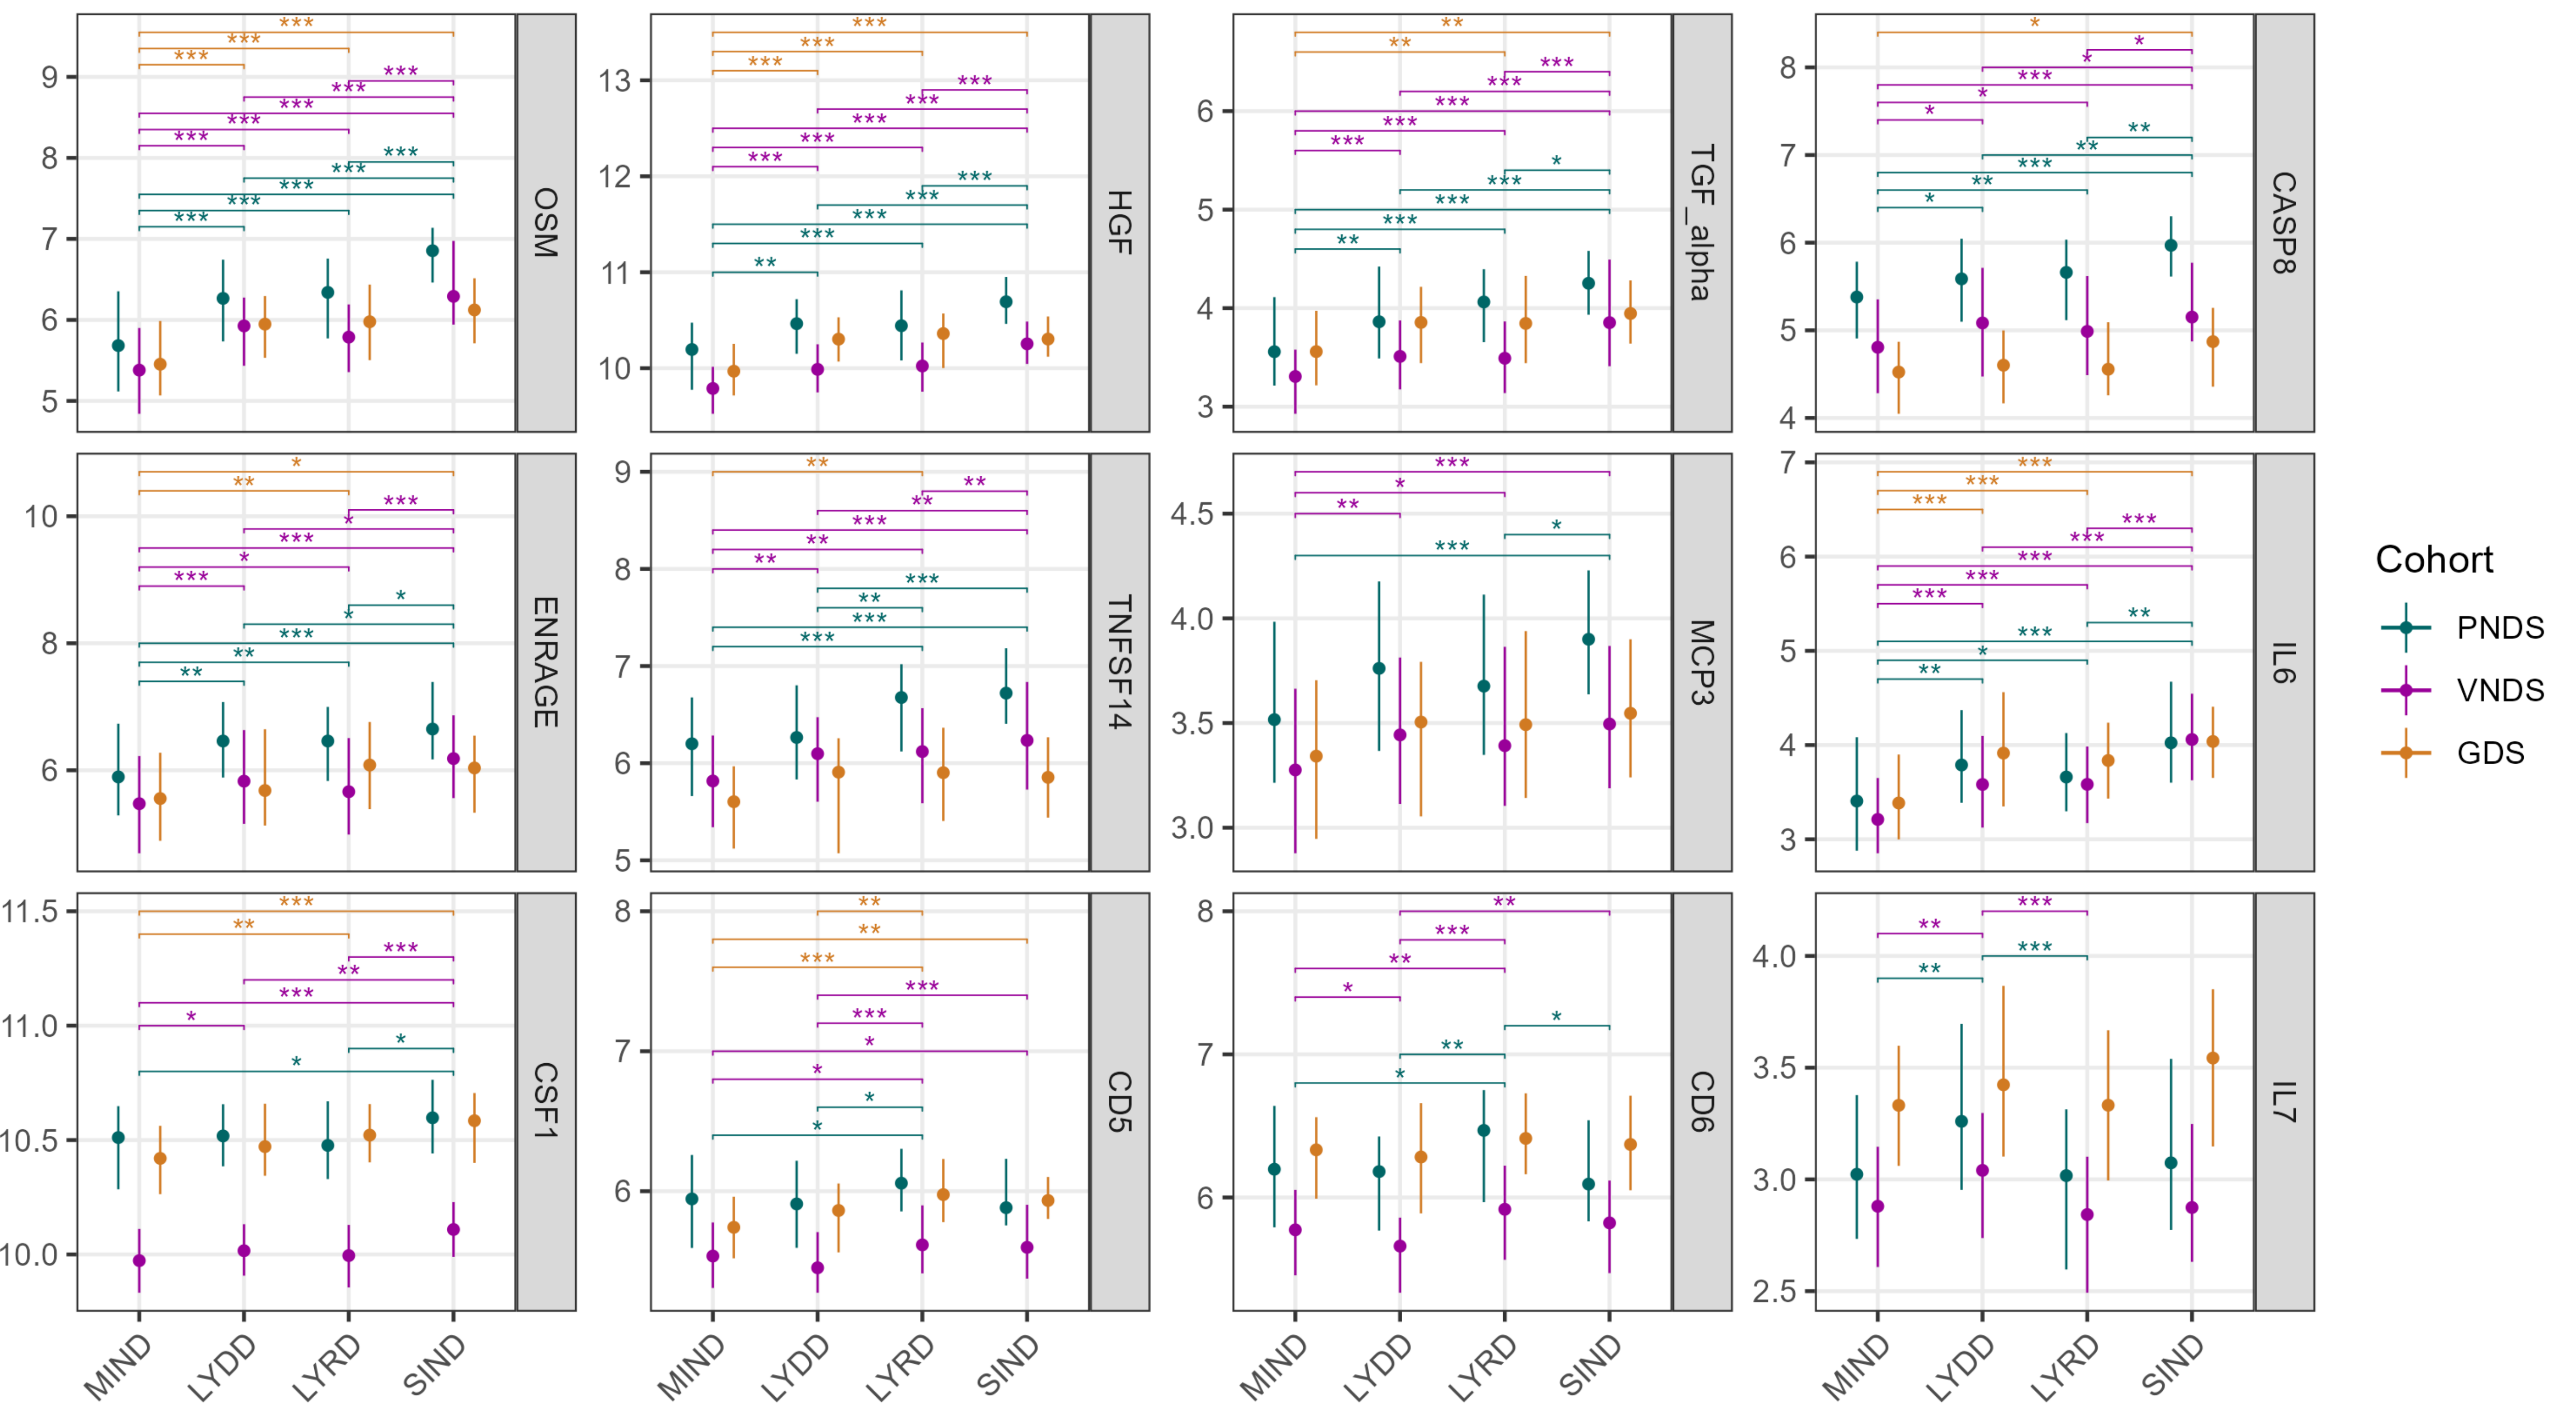

**Extended Data Fig. 3: Inflammation-related proteomic signatures of T2D endotypes across cohorts (related to Fig. 4)**

**a**, Pairwise comparisons of proteins with at least one significant pairwise difference in PNDS (n = 384), VNDS (n = 660), and GDS cohort (n = 354). Heatmaps show the mean rank differences in pairwise comparisons of the Dunn test and corresponding P values in asterisks **b**, Common proteins enriched in MIND, LYRD, and LYDD across the cohorts. **c**, Pathway enrichment analysis of endotype-enriched proteins in SIND across PNDS, VNDS and GDS cohort. **d**, Levels of endotype-enriched proteins across endotypes in three cohorts. In the line plots, dots represent median values and error bars indicate the interquartile range (Q1, Q3). Pairwise comparisons between endotypes were performed using Dunn’s test.



**a** PBMC scRNA

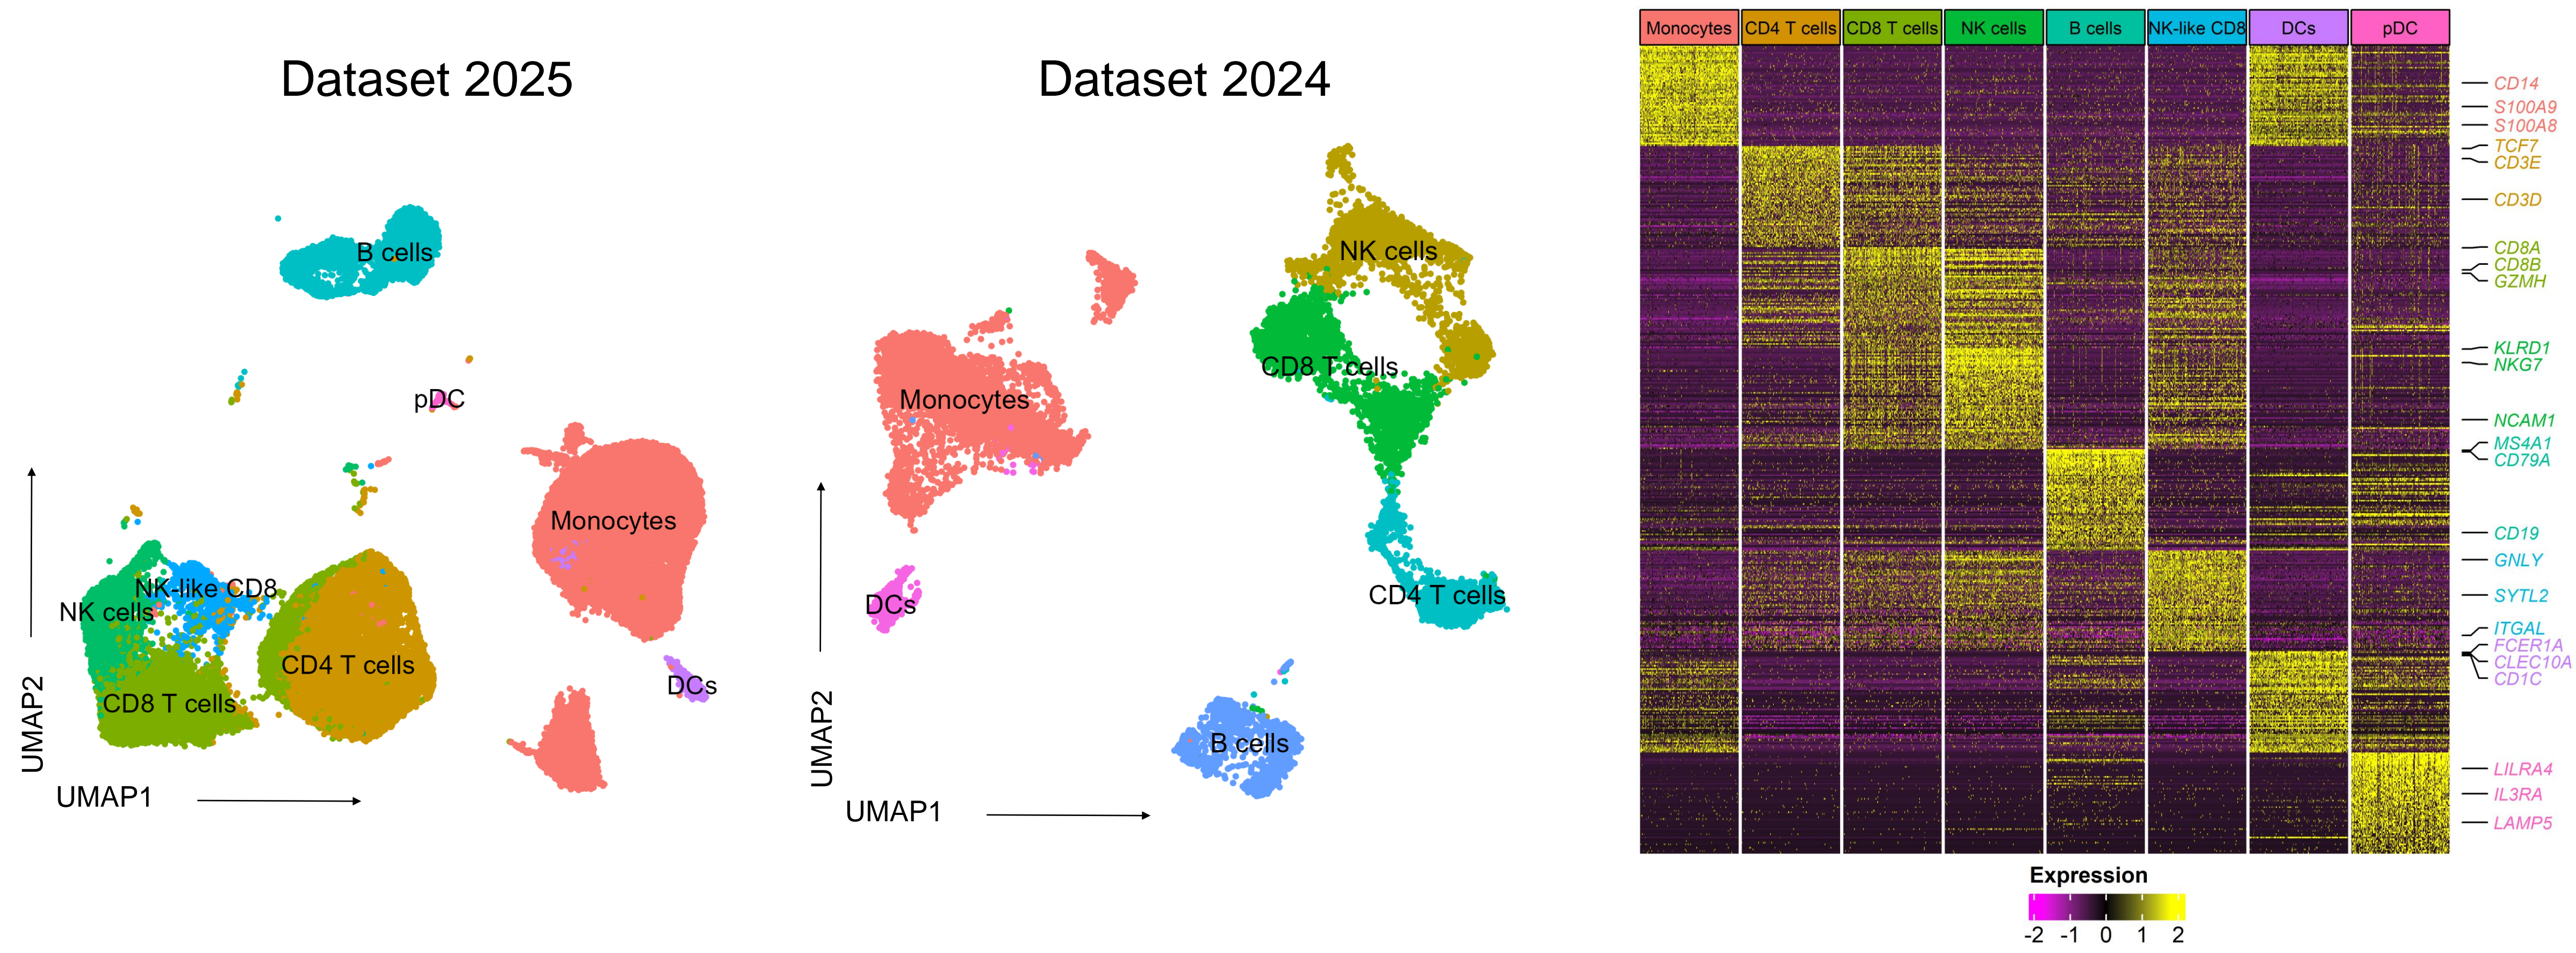

**b** Monocyte scRNA

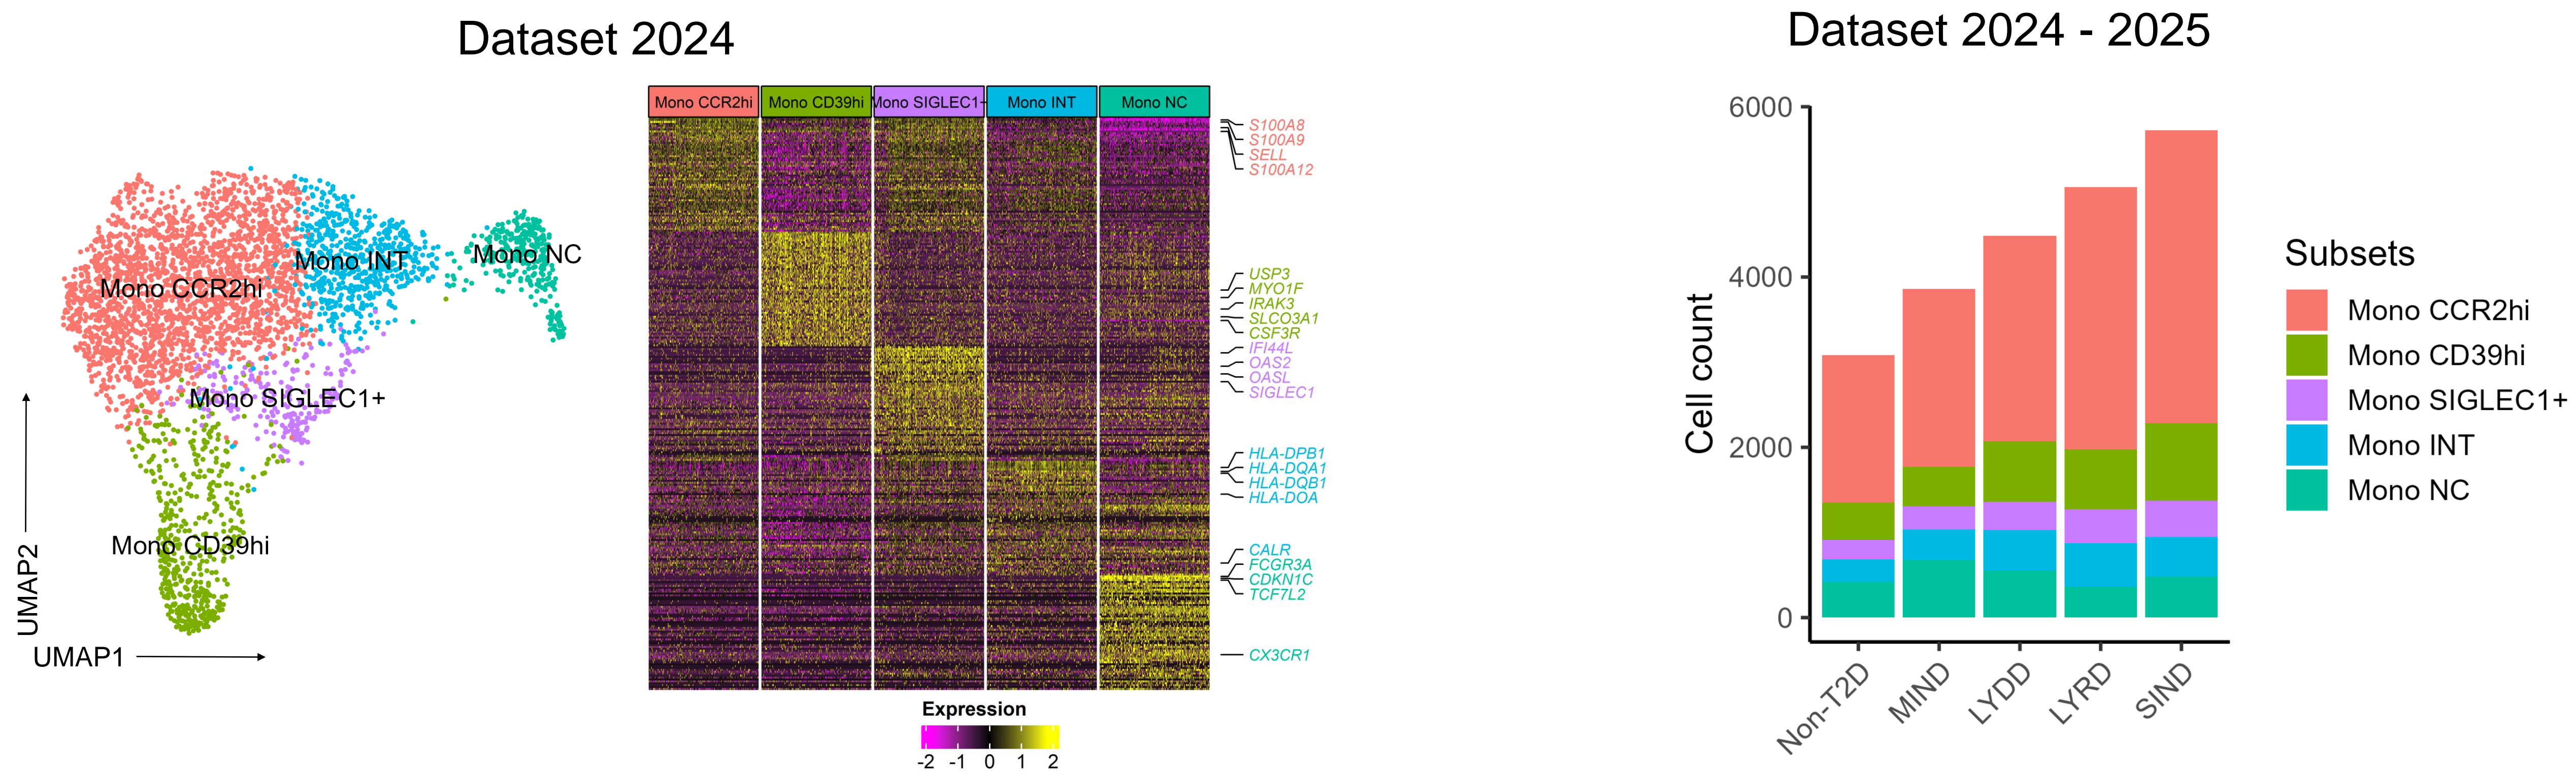

**c** CD4+ lymphocyte scRNA

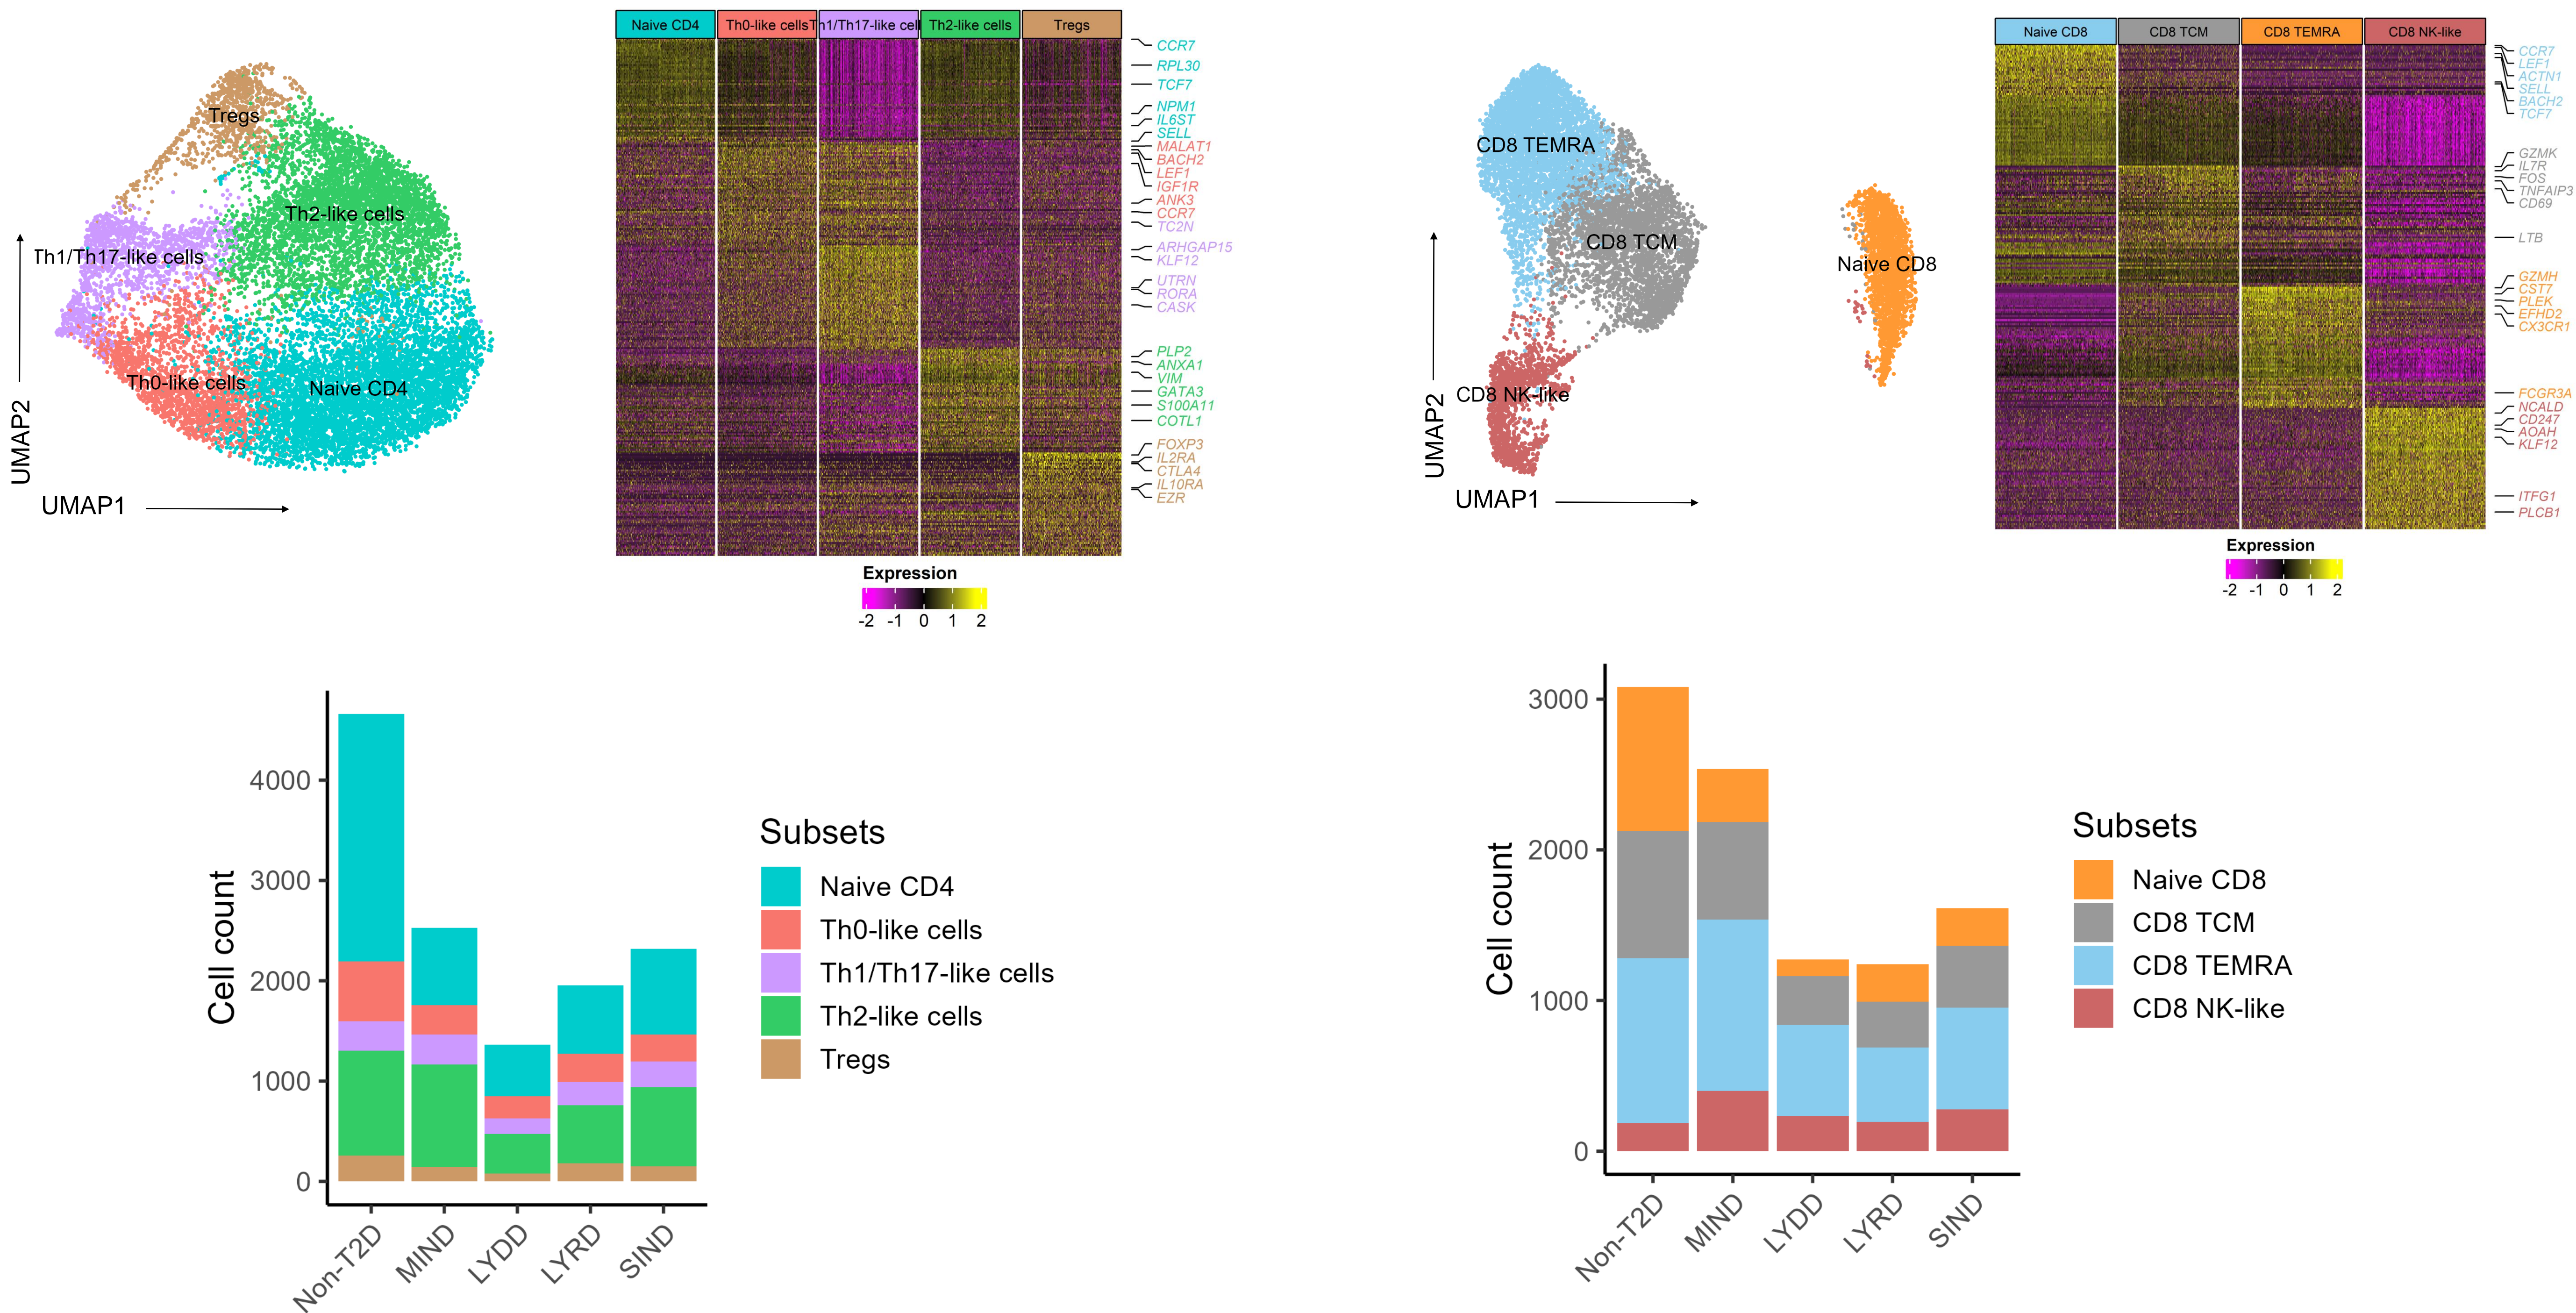

**Extended Data Fig. 4: Single-cell RNA-sequencing of PBMCs revealing monocyte and lymphocyte composition across endotypes (related to Fig. 5)**

**a**, UMAP visualization of PBMC subpopulations derived from scRNA-seq, with heatmap of top marker genes. **b**, UMAP visualization of monocyte subsets derived from scRNA-seq, with heatmap of top marker genes (**left**). Monocyte subset counts in non-T2D group and T2D endotypes (**right**). **c**, UMAP visualization of CD4+ and CD8+ lymphocyte subsets derived from scRNA-seq; heatmap of top marker genes; CD4+ and CD8+ lymphocyte subset counts in non-T2D group and T2D endotypes.



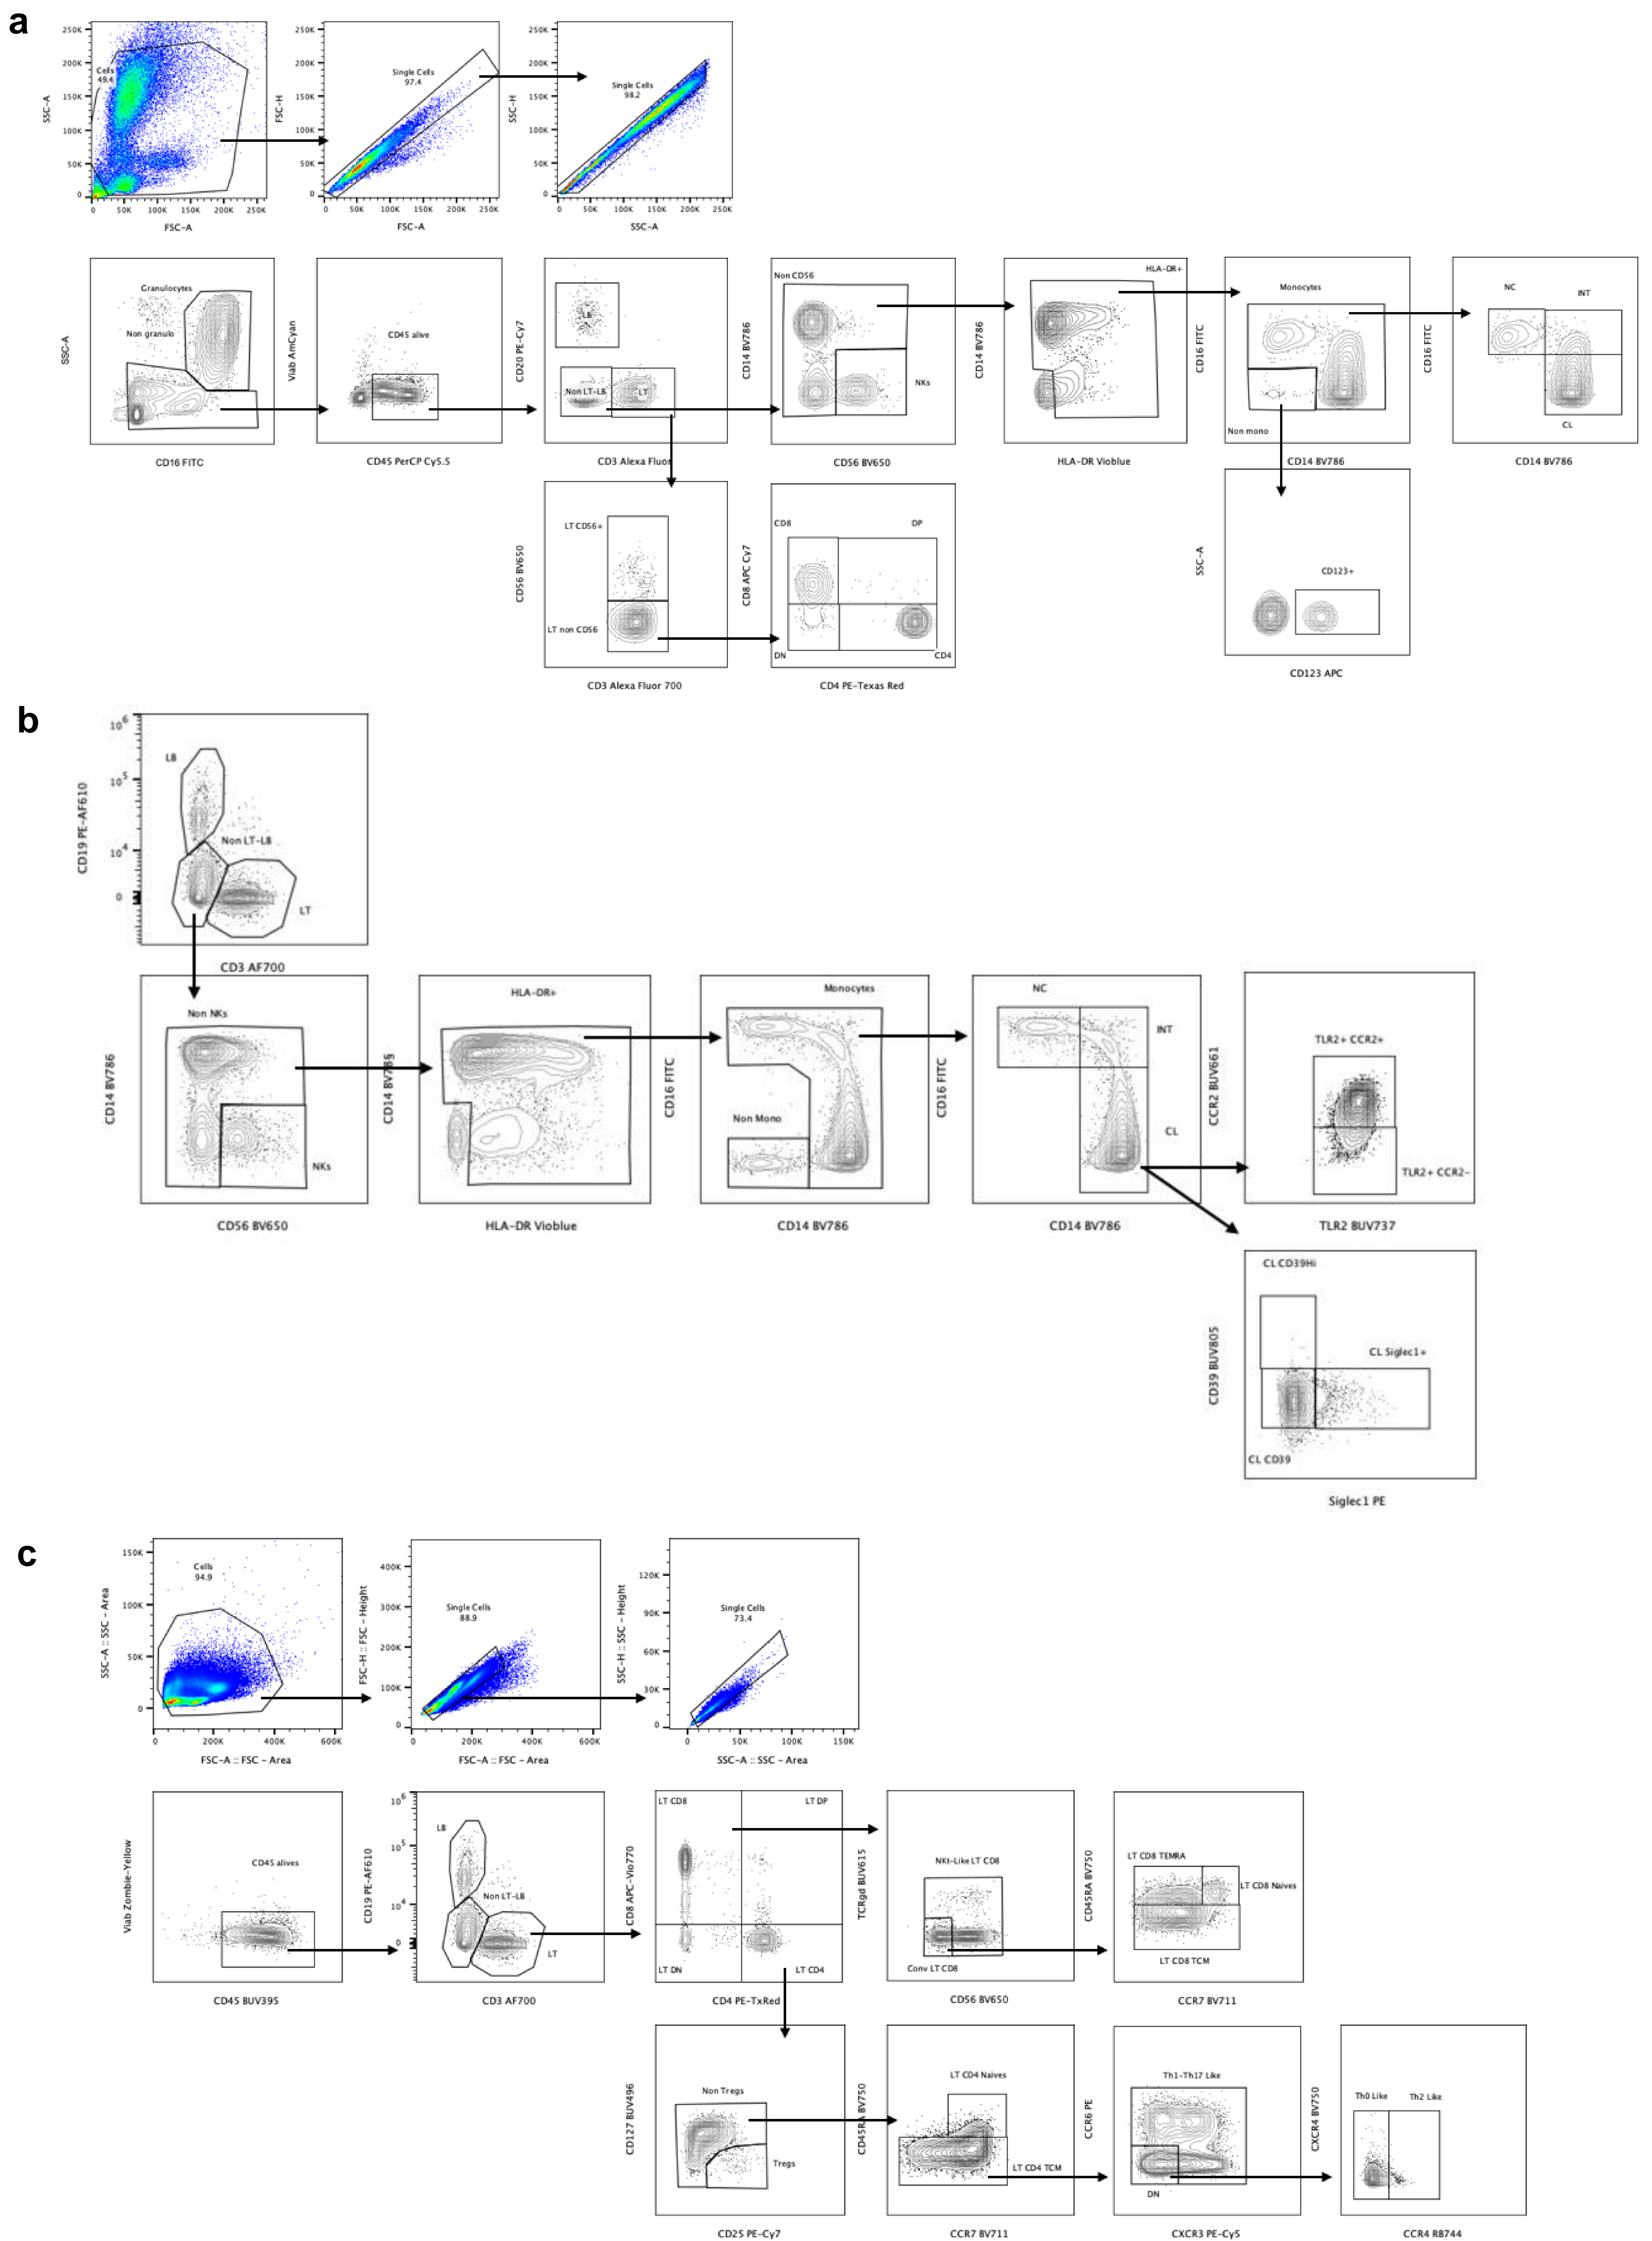

**Extended Data Fig. 5: Flow cytometry gating strategy (related to Fig. 5)**

**a-c**, Gating strategy identifying PBMC subpopulations (**a**), monocyte subsets (**b**), and lymphocyte subsets (**c**).



a

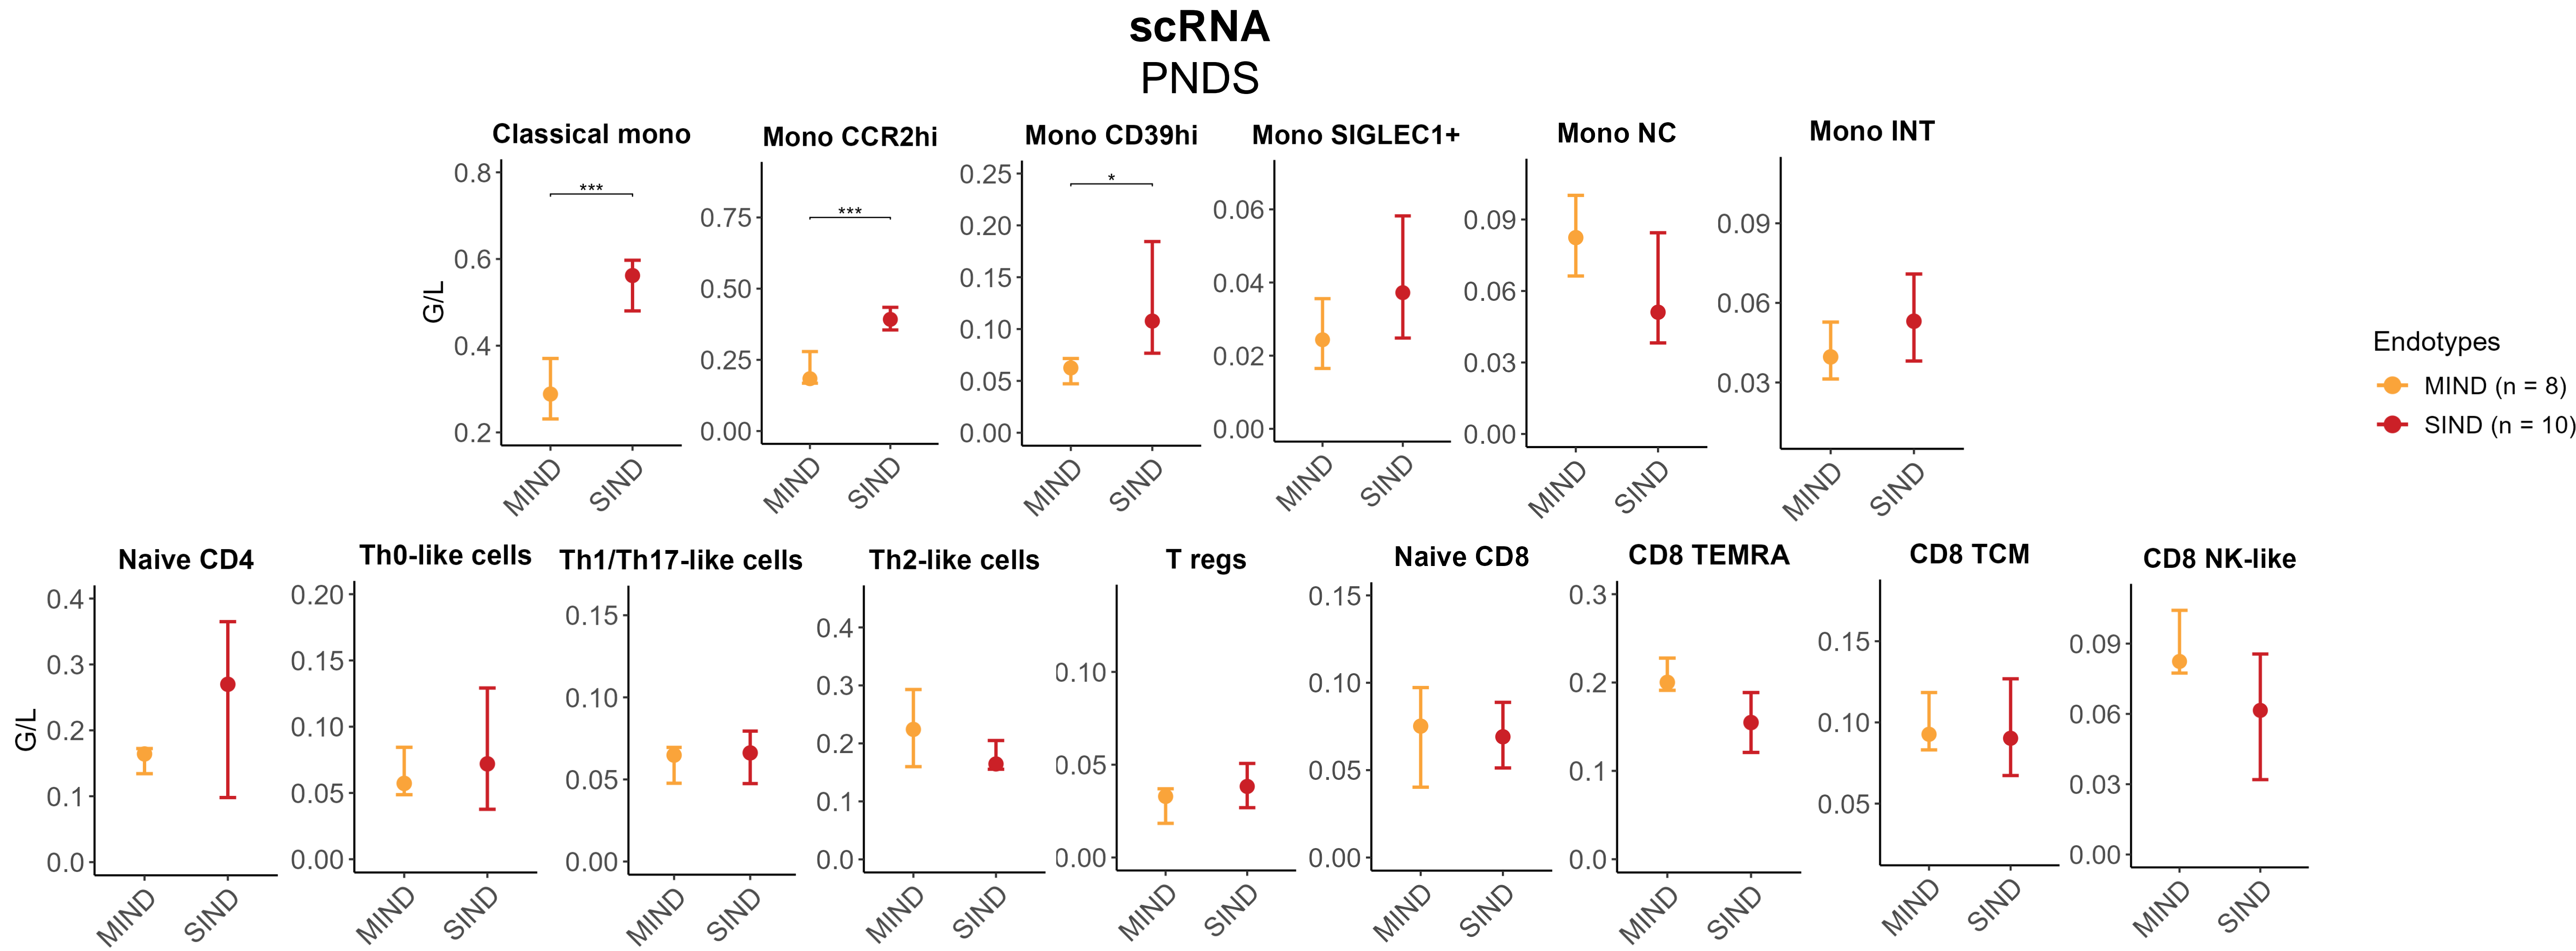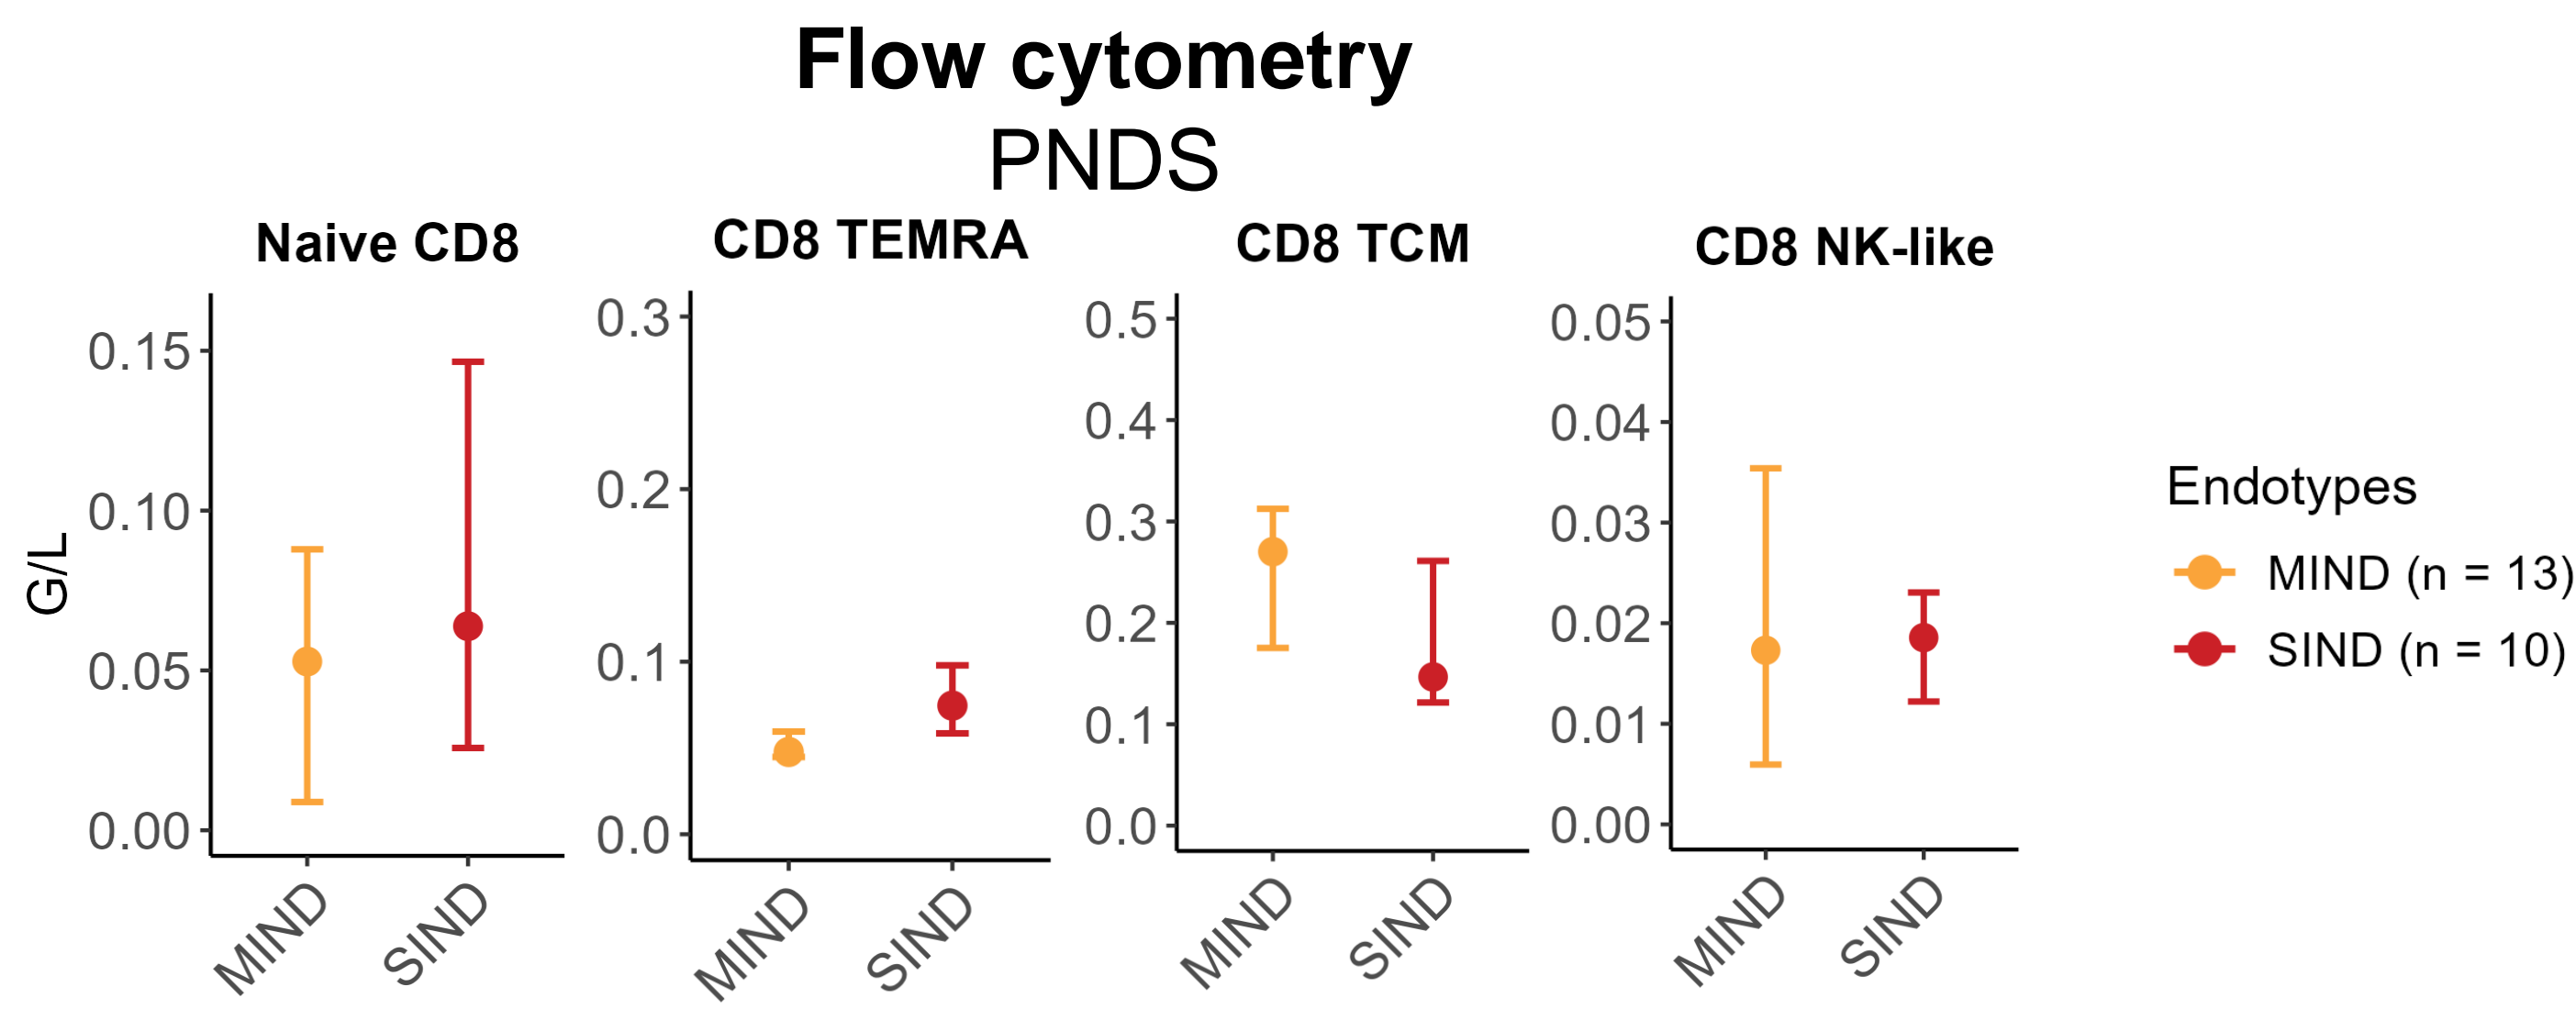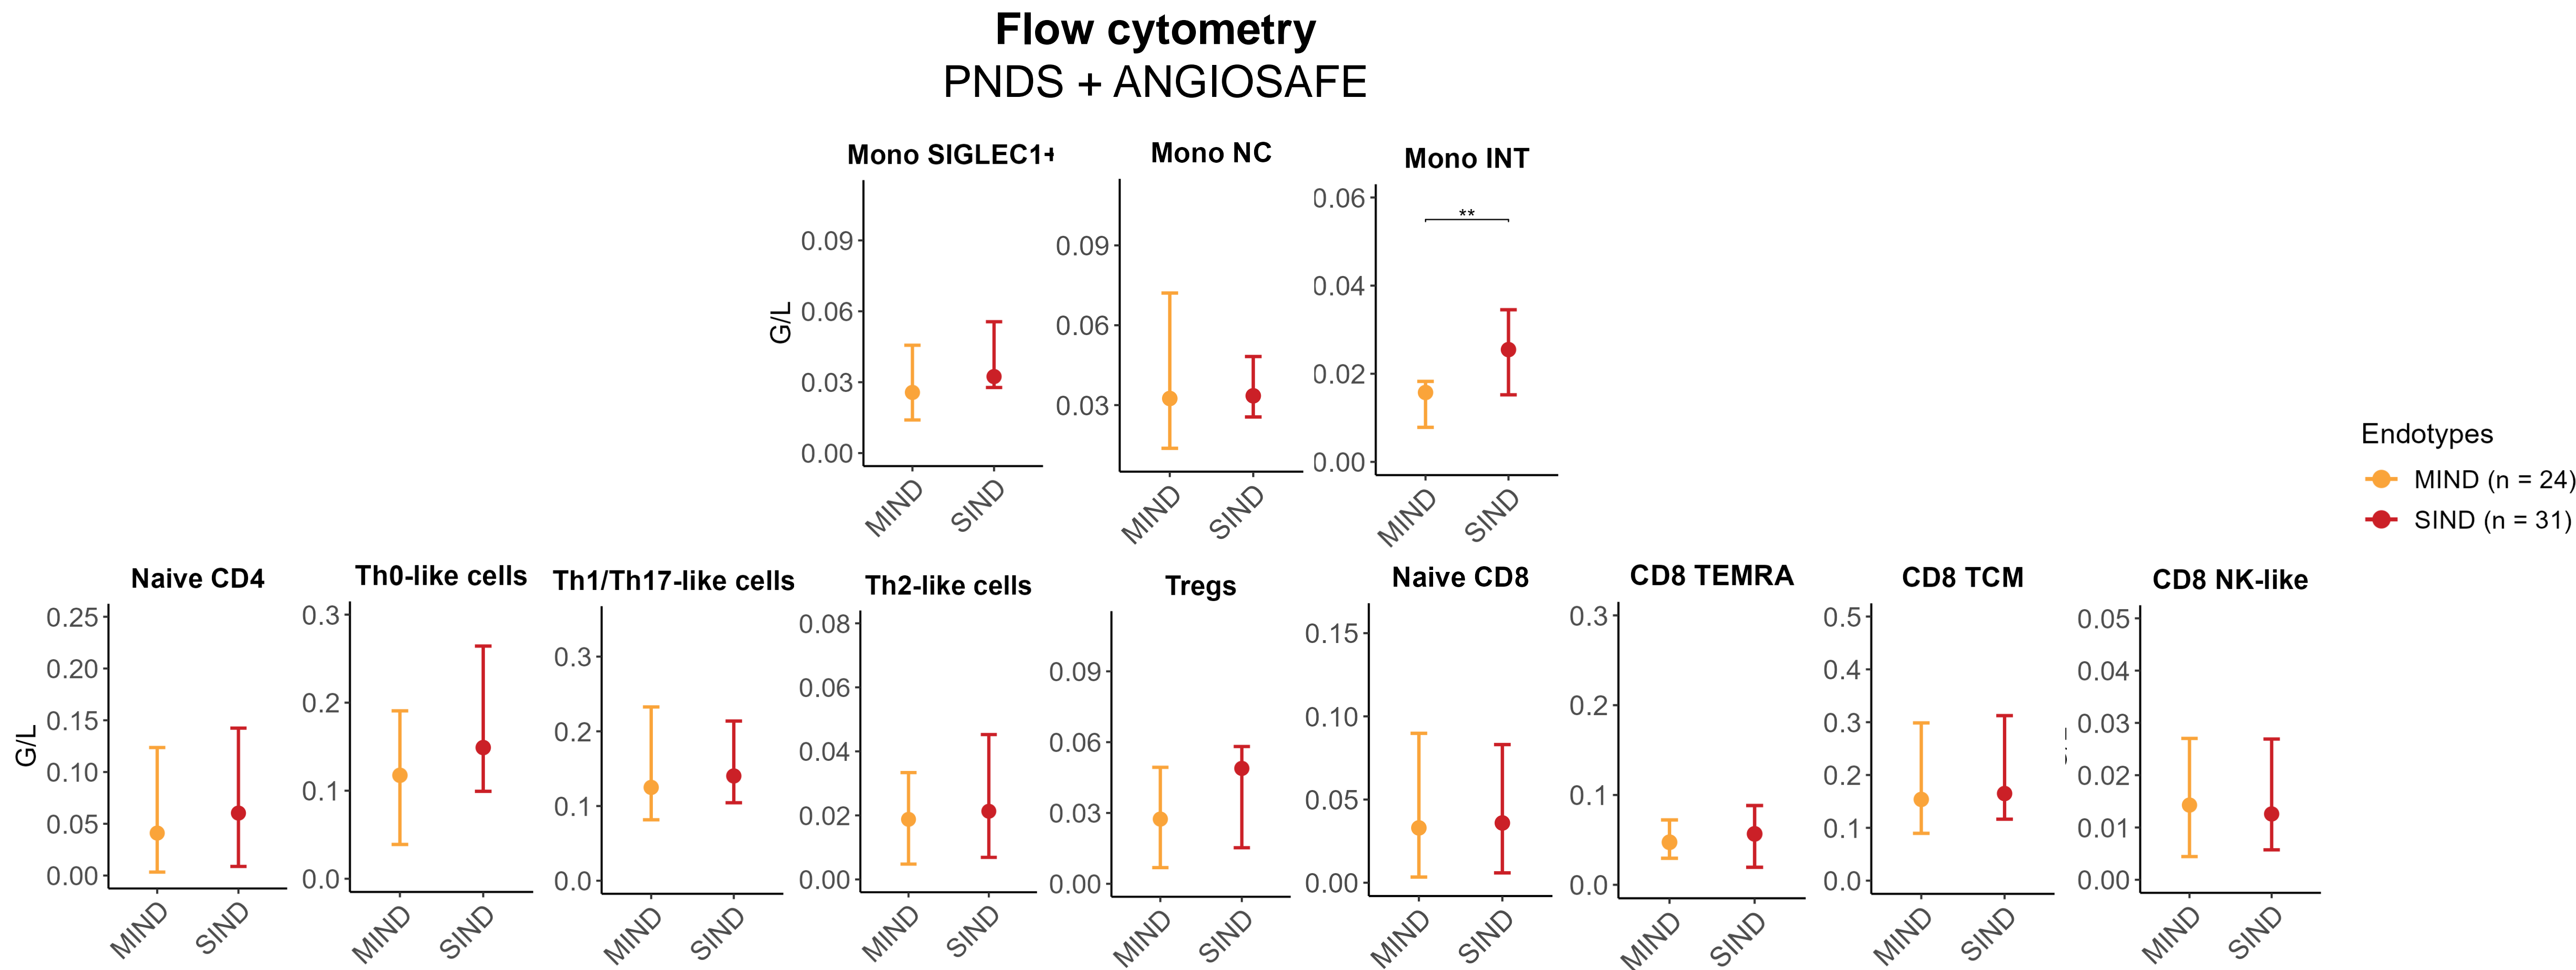



**b**

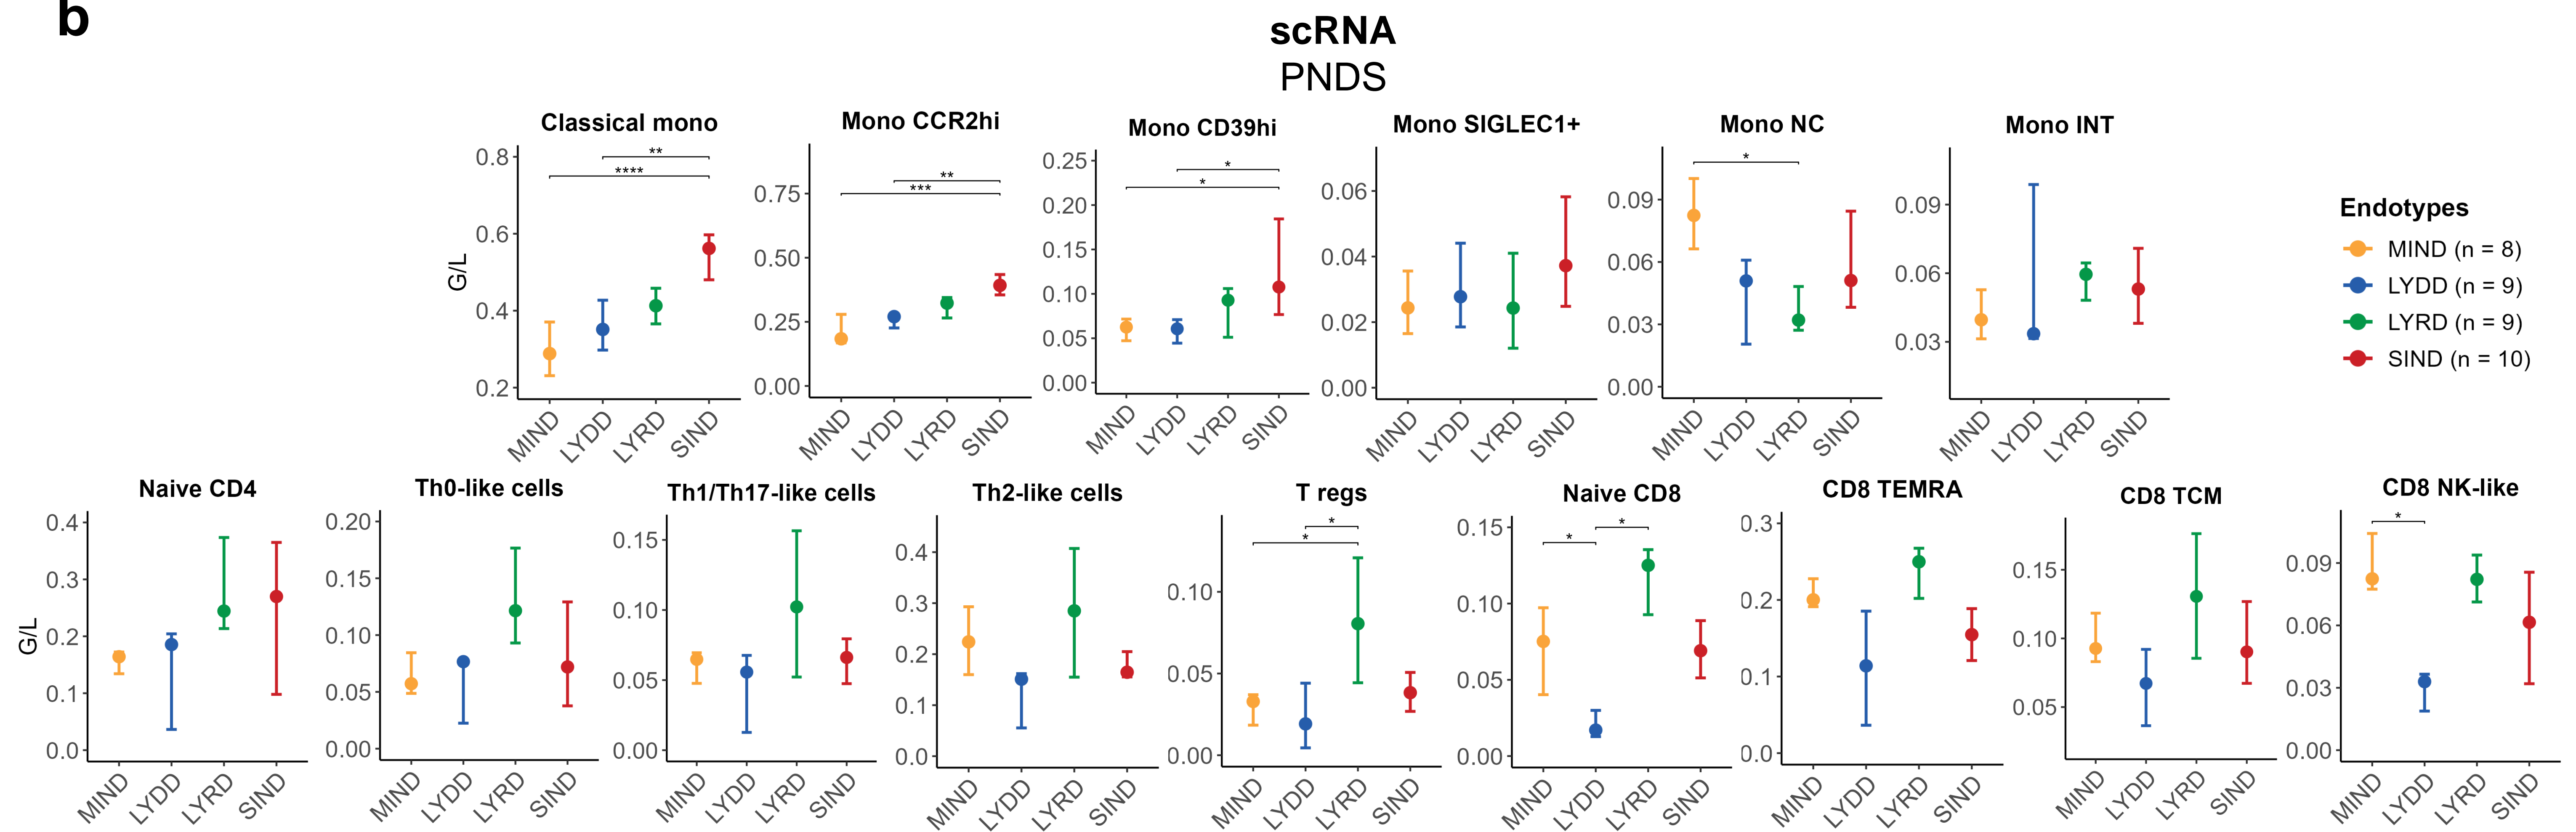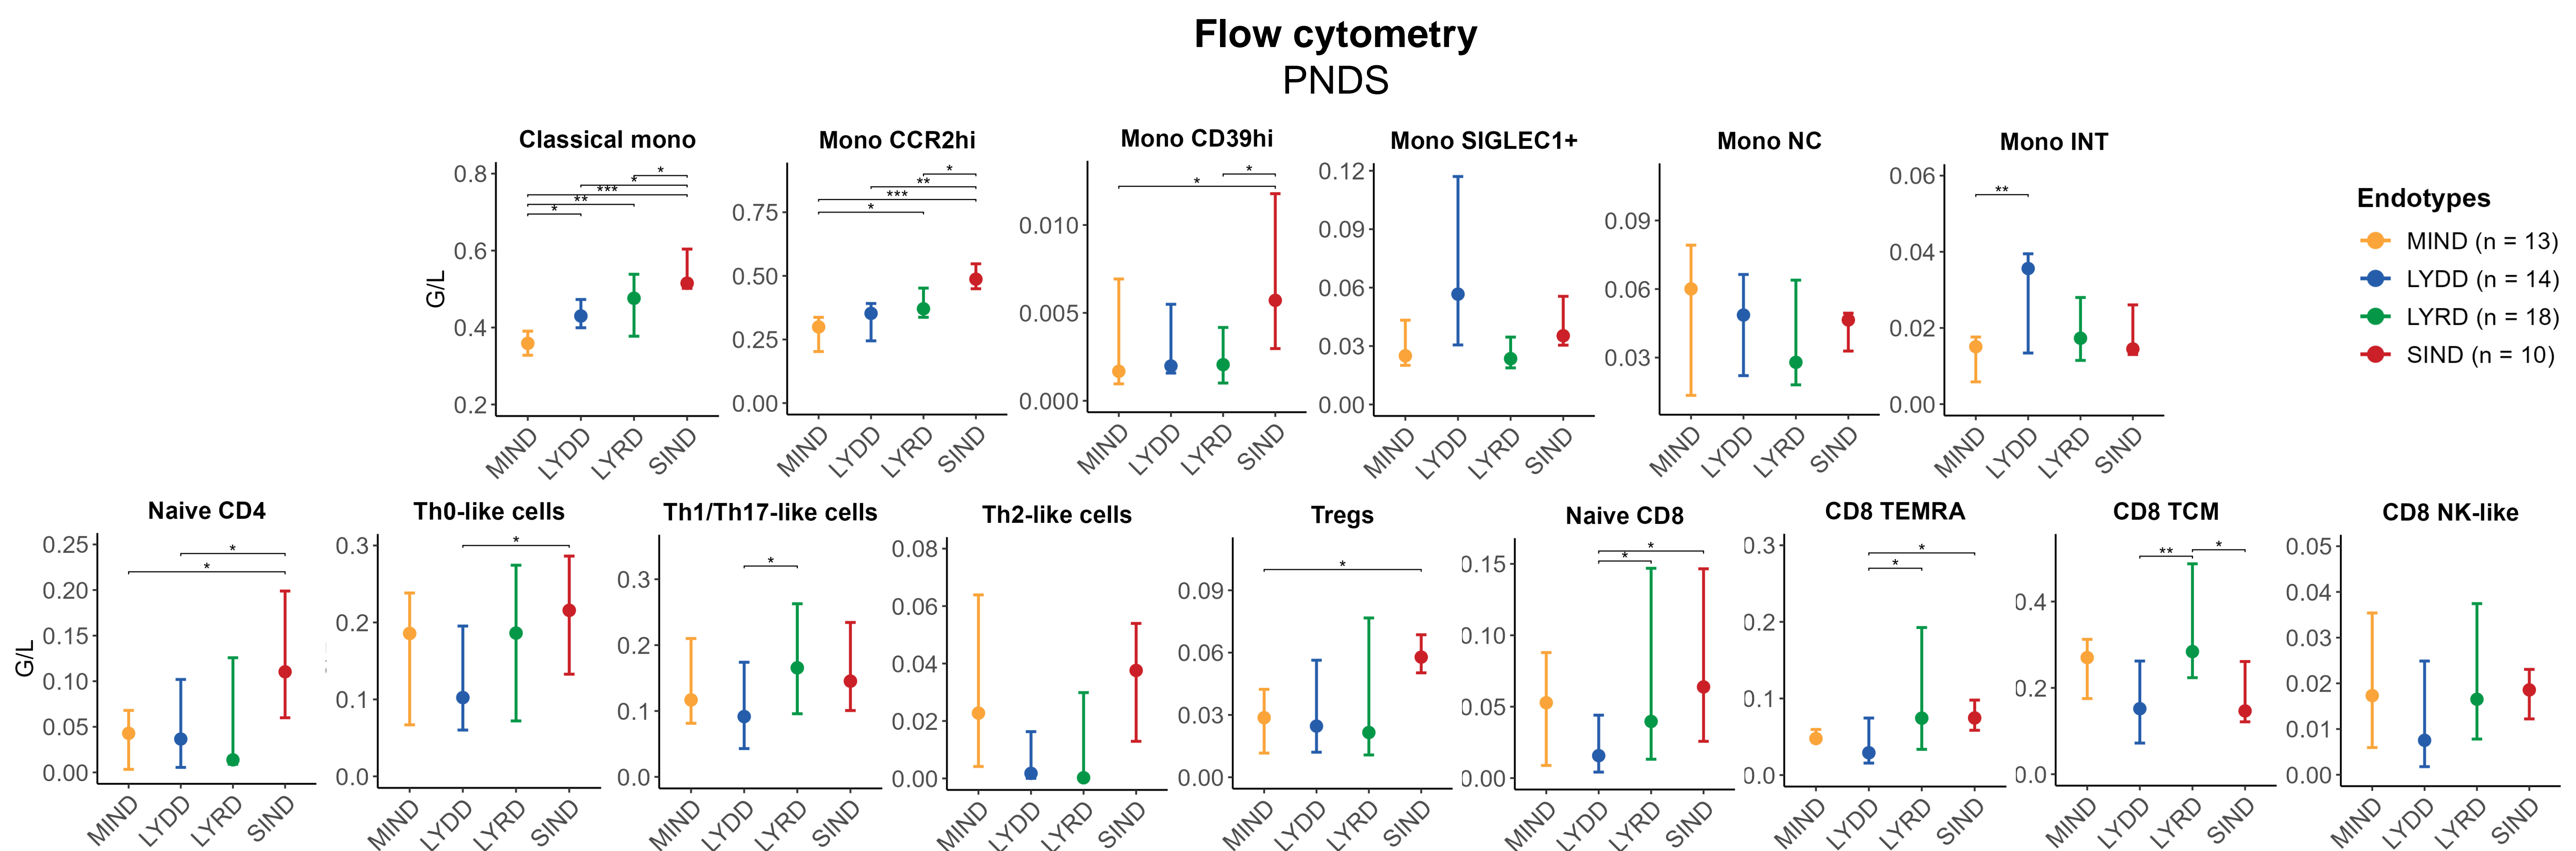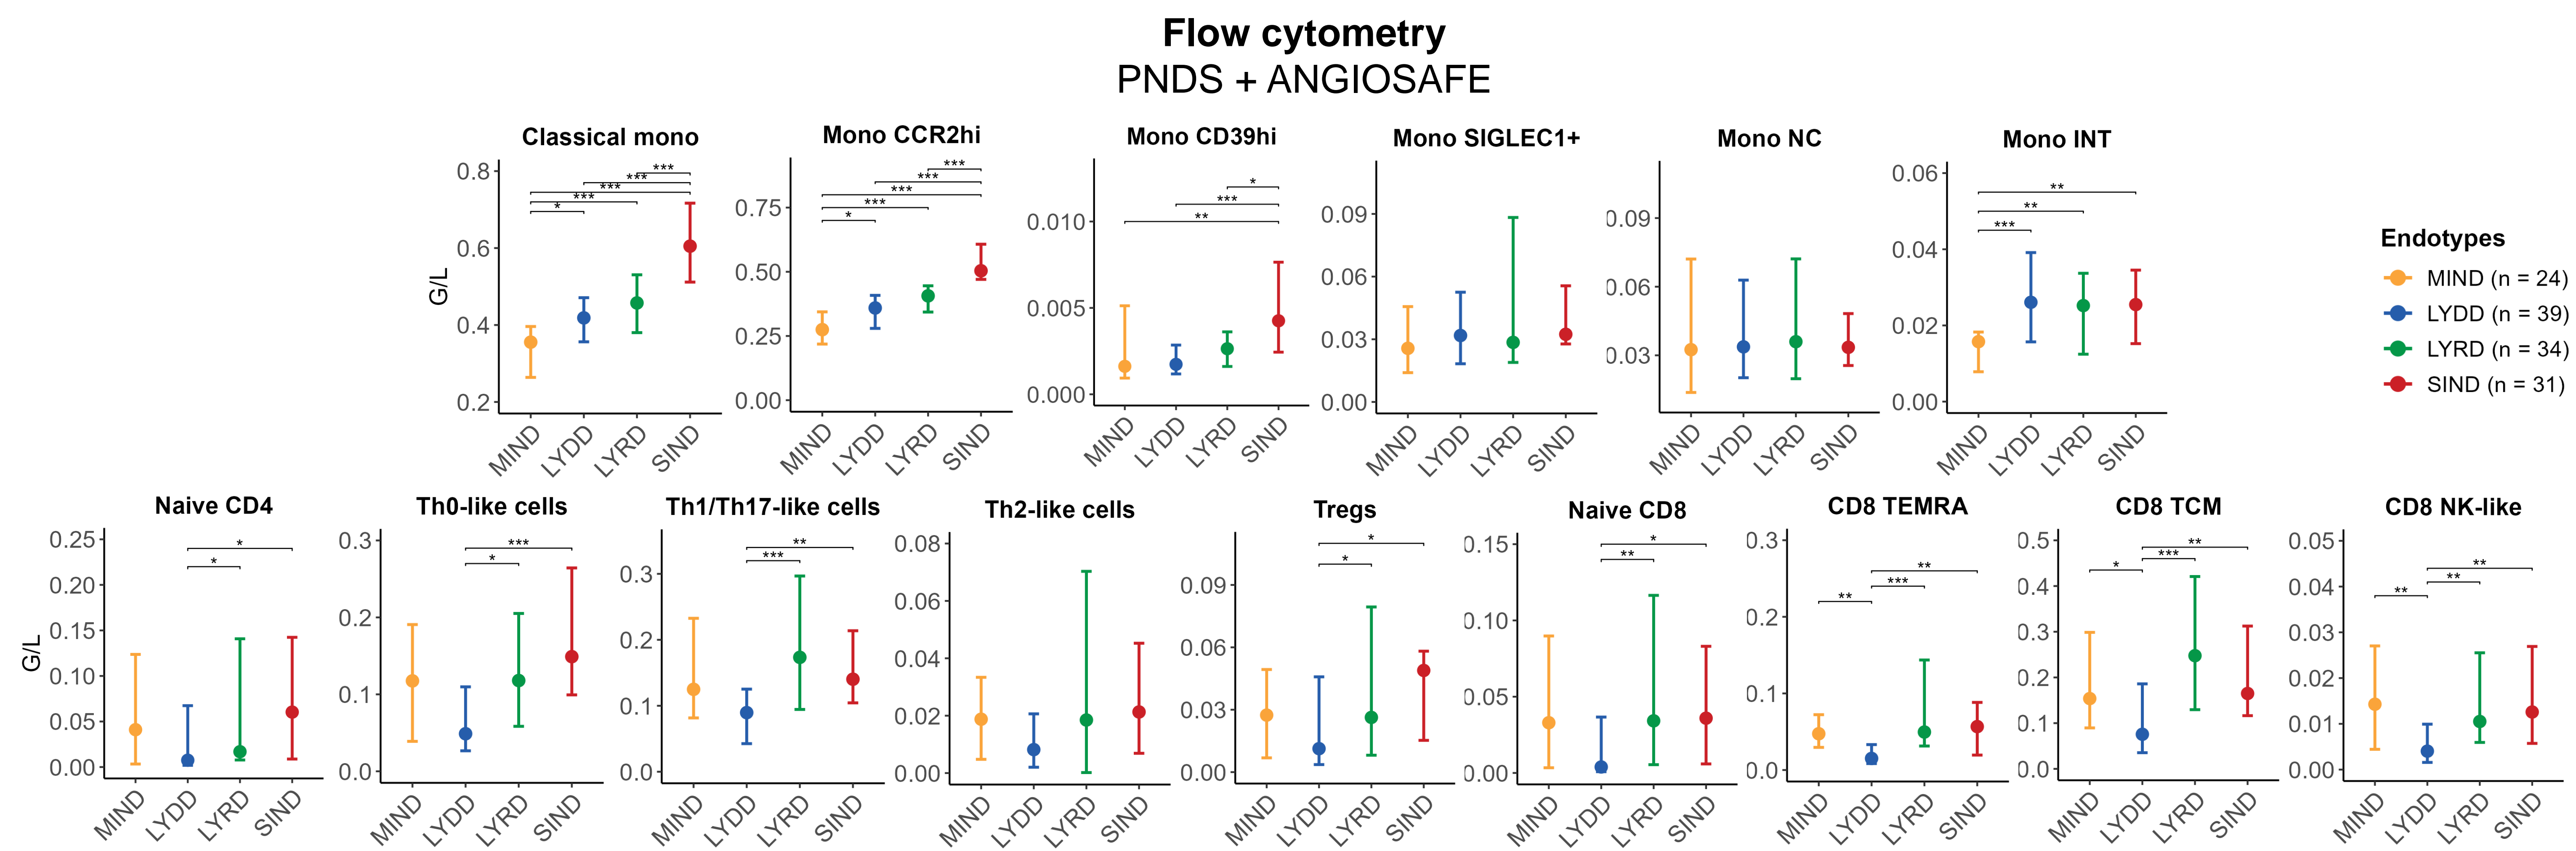

**c**

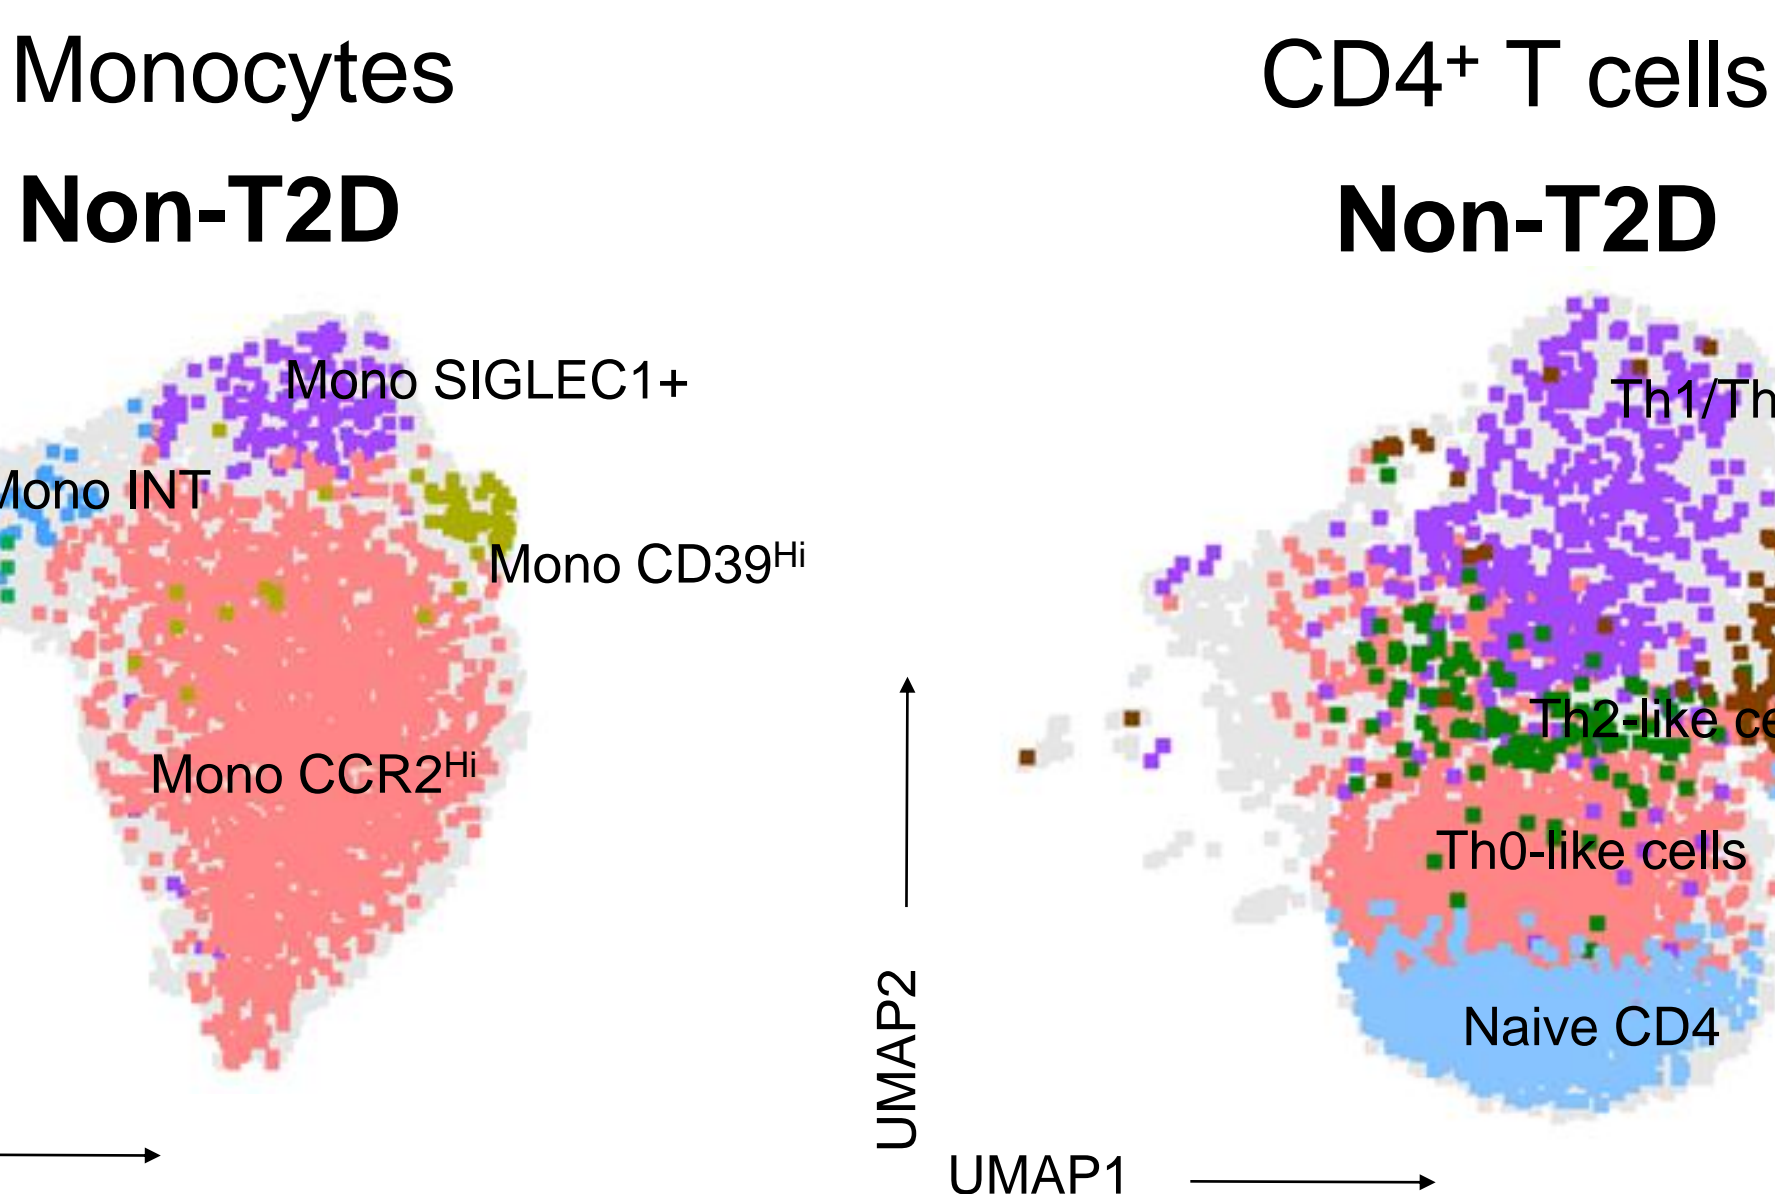

**d**

**Enriched pathways of Mono CCR2hi**

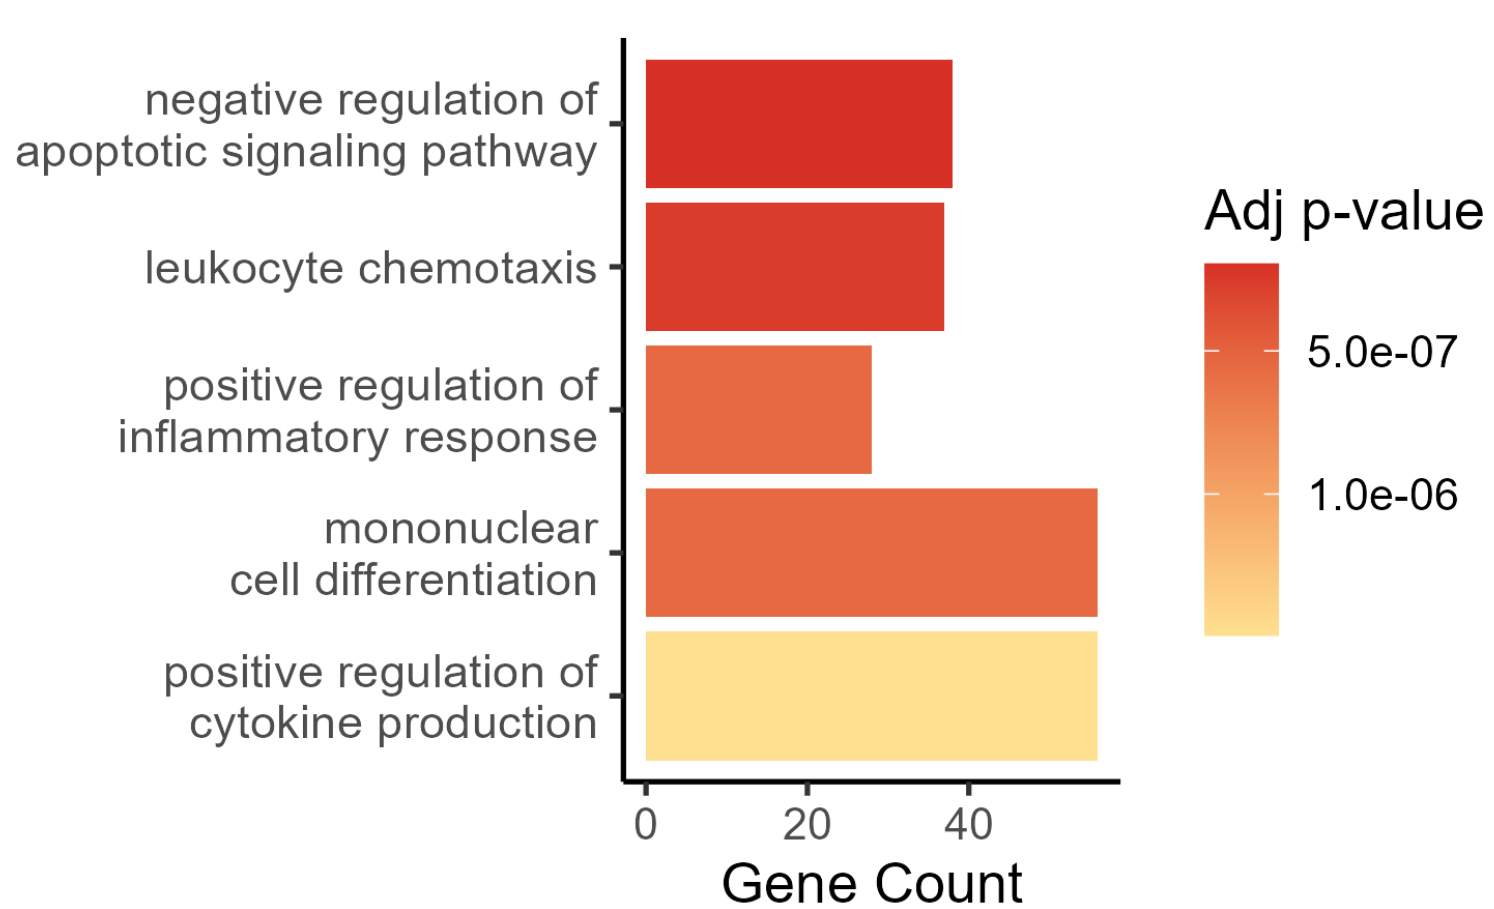

**Enriched pathways of Mono CD39hi**

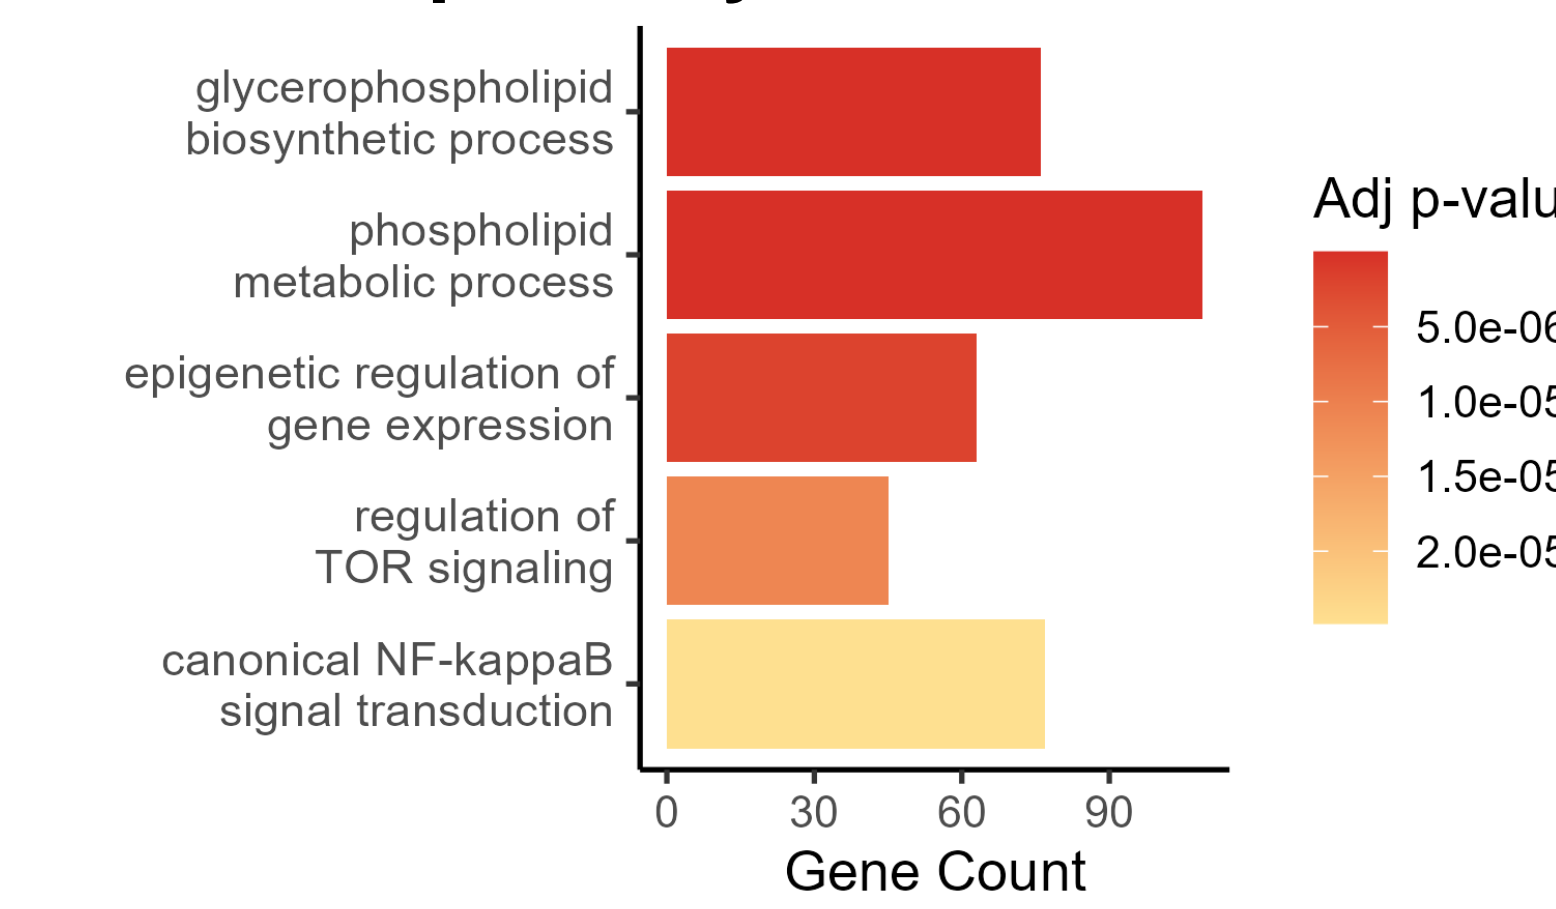

**Extended Data Fig. 6: Monocyte and lymphocyte subset counts across T2D endotypes from single-cell RNA-sequencing and flow cytometry (related to Fig. 5)**

**a-b** Monocyte and lymphocyte subset counts derived from scRNA-seq data and flow cytometry in SIND and MIND (**a**), and across four endotypes (**b**). **c**, UMAP plot of monocyte and lymphocyte subsets identified by flow cytometry of non-T2D groups. **d**, Enriched pathways of Mono CCRhi and Mono CD39hi (scRNA-seq). In the line plots, dots represent median values and error bars indicate the interquartile range (Q1, Q3). Pairwise comparisons between endotypes were performed using Dunn's test. Comparisons between SIND and MIND were performed using Mann–Whitney U test.
